# Supplementary material for: Air–Sea Exchange and Atmospheric Deposition of Phthalate Esters in the South China Sea
Source: PubMed Central journal article supplement (PMC10399291; doi:10.1021/acs.est.2c09426), 2023-07-17
Supplement: es2c09426_si_001.pdf [file es2c09426_si_001.pdf]

## Supporting information

# Air-sea exchange and atmospheric deposition of phthalate esters in the South China Sea

Lijie Mi<sup>†,‡</sup>, Zhiyong Xie<sup>†\*</sup>, Weihai Xu<sup>□</sup>, Joanna J. Waniek<sup>\*</sup>, Thomas Pohlmann<sup>‡</sup>, Wenying Mi<sup>□</sup>

<sup>†</sup>Institute of Coastal Environmental Chemistry, Helmholtz-Zentrum Hereon, Geesthacht 21502, Germany

<sup>‡</sup>Institute of Oceanography, University of Hamburg, 20146 Hamburg, Germany

<sup>□</sup>Key Laboratory of Ocean and Marginal Sea Geology, South China Sea Institute of Oceanology, Chinese Academy of Sciences, Guangzhou 510301, China

<sup>\*</sup>Department of Marine Chemistry, Leibniz Institute for Baltic Sea Research Warnemünde, Rostock 18119, Germany

<sup>□</sup>MINJIE Institute of Environmental Science and Health Research, Geesthacht 21502, Germany

\*Corresponding author: e-mail: [Zhiyong.xie@hereon.de](mailto:Zhiyong.xie@hereon.de), Tel: +49 4152 872330

Pages: 39

Test: S1-S3

Figure S1-S5

Table S1-S17

## Content

Text S1. Chemicals and materials

Text S2. Washout ratio

Text S3. Air-sea exchange

Text S4. Atmospheric particle deposition

Text S5. Pearson correlation analysis

Figure S1. Air sampling stations in the South China Sea, with the blue dots marked at the starting position of each air sample

Figure S2. (A) Seawater sampling stations in the South China, with the blue dots marked at the starting position of each air sample. The color map shows the salinity profile in surface seawater; (B) general water mass circulation in the research area in summer

Figure S3A. High-volume air sampler is equipped with quartz fiber filter for atmospheric particles and a PUF/XAD-2 column for gaseous phase. The air sampler is placed at the upper deck and operated with headwind. The Filter and PUF-XAD-2 column are changed at sampling site. The PUF/XAD-2 column can be sealed with glass caps immediately after its disconnection from the sampler to eliminate exposure time to the indoor air. The Quartz fiber filter is wrapped in clean aluminum. The PUF/XAD2 columns and filters are stored at -20°C; S3B: The set-up of the high-volume water sampler equipped with glass fiber filter and a XAD-2 column. The high-volume water sampler is connected to the ship-intake system with metal tubing. A glass fiber filter is closed in the filter holder to collect suspended particular matters and a XAD-2 column to retain organic chemicals in the dissolved phase. The seawater flows over the entire system at a flow rate of 0.2-1 L/min. The XAD-2 column is sealed with clips immediately after the sampling, and stored at 5°C. Glass fiber filter is wrapped in a clean aluminum foil and stored at -20°C.

Figure S4. Air mass back trajectories of air samples. Colors indicate the origin of the air mass parcels

Figure S5. Figure S4. The schematic diagrams of the flow field of the South China Sea in 7th (A) 13th (B), 19th (C) and 25th (D) in August 2019

Table S1. Detail information for air sampling

Table S2. Detail information for seawater sampling

Table S3. Information about chemicals in this study

Table S4. Physiochemical properties of seven phthalate esters

Table S5. Table S 5. Agilent 7890 GC-MS/MS conditions

Table S6. Detail information for the determination of PAEs using GC-MS/MS

Table S7. The field blanks and the method detection limits of PAEs in PUF/XAD-2, XAD-2 columns, QFF and GFF filters

Table S8. Concentrations of PAEs in the atmosphere over the South China Sea

Table S9. Particle-bound fractions ( $\phi$ ) of PAEs in air samples from the South China Sea. The particle-bound fractions are quite uncertain because BBP and DCHP were below MDLs in most particle samples.

Table S10. Washout ratio (W) calculated with particle bound fraction following eq.  $W = (1-\phi)(RT/H) + \phi W_p$

Table S11. Concentrations of PAEs in the seawater from the South China Sea

Table S12. Comparison with previous studies for the concentrations of seven PAEs in seawater (ng/L)

Table S13. Particle-bound fractions ( $\phi$ ) of PAEs in seawater from the South China Sea

Table S 14. Correlation analysis of PAEs in air

Table S 15. Correlation analysis of PAEs in seawater

Table S16. Air-sea exchange fluxes of PAEs in the South China Sea. Positive value indicates water to air volatilization and negative value indicates air to water deposition

Table S17. Particle dry deposition of PAEs in the South China Sea

### **Text S1. Chemicals and materials**

PAEs standard mixture, containing Dimethyl phthalate (DMP), Diethyl phthalate (DEP), Diisobutyl phthalate (DiBP), Di-*n*-butyl phthalate (D*n*BP), Butylbenzyl phthalate (BBP), Dicyclohexyl phthalate (DCHP) and Di(2-ethylhexyl) phthalate (DEHP) at 1000 µg/mL each, and surrogate standards, e.g. deuterated dimethyl phthalate (DMP d4), diethyl phthalate (DEP d4), *n*-dibutyl phthalate (D*n*BP d4) and di(2-ethylhexyl) phthalate (DEHP d4), were supplied by LGC (Wesel, Germany).

Picograde® solvents, e.g. methanol, acetone, *n*-hexane and dichloromethane (DCM) were purchased from Promochem (Germany). Neutral silica gel (0.063-0.2 mm) was supplied by Macherey Nagel (Düren, Germany) and anhydrous sodium sulphate (99%) and XAD-2 resin was obtained from Merck (Darmstadt, Germany).

### **Text S2. Washout ratio**

Considering both vapor and particle scavenging mechanism, washout ratio (*W*) can be expressed as equation 1,

$$W = (1-\varnothing)(RT/H)+\varnothing W_p \quad (1)$$

where  $\varnothing$  is the particle-bound fraction of the chemical,  $RT/H$  is the dimensionless Henry's law constant (*H*) at the ambient temperature (298 K), and  $W_p$  is the particle scavenging coefficient<sup>1</sup>. A representative  $W_p$  value of 20,000 is used for the calculation in this work.<sup>2</sup>

### **Text S3. Air-sea exchange**

During the transport from continental sources to the South China Sea, PAEs may undergo several processes at the interface between air and seawater. The direction and fluxes of air-sea exchange of PAEs are mainly controlled by their physicochemical parameters such as Henry's Law Constants and the concentrations in air and seawater, and are influenced by metrological conditions. In this work, air-sea exchange fluxes of PAEs were calculated using the modified version of Whitman's two-film fugacity model, which has been extensively

applied for the evaluation of PAHs, PCBs and PAEs in the marine environment,<sup>3-5</sup> The volatilization and deposition fluxes ( $F_{vol}$  and  $F_{dep}$ , ng/m<sup>2</sup>/day) are calculated as in equation 3 and 4,

$$K_{OL} = \left( \frac{1}{K_w} + \frac{1}{K_a * H} \right)^{-1} \quad (2)$$

$$F_{vol} = K_{OL} C_w \quad (3)$$

$$F_{dep} = K_{OL} C_a / H' \quad (4)$$

The net diffusive gas exchange flux ( $F$ , ng/m<sup>2</sup>/day) is then calculated by subtracting the volatilization flux from the deposition flux, which is described as equation 5,

$$F = K_{OL} \left( C_w - \frac{C_a}{H'} \right) \quad (5)$$

where  $C_w$  (ng/m<sup>3</sup>) and  $C_a$  (ng/m<sup>3</sup>) are the dissolved- and gas-phase concentrations,  $(C_w - C_a/H')$  describes the concentration gradient (ng/m<sup>3</sup>),  $H'$  is the dimensionless Henry's law constant. The  $K_{OL}$  (m/s) is the overall mass transfer coefficient, which contains contributions from the mass transfer coefficients of the water phase ( $k_w$ ) and the air phase ( $k_a$ ). The calculation of  $K_w$  and  $K_a$  for PAEs refer to the equations recommended by Schwarzenbach et al.<sup>6</sup> and Wanninkoff's quadratic relationship.<sup>7</sup>  $H'$  of PAEs are corrected with temperature of seawater ( $T_w$ , K) and averaged salt concentration ( $C_s$ , 0.5 mol/L). The total propagation error in  $F$  was 45%, which is derived from an error propagation analysis from previous studies.<sup>5</sup> A positive  $F$  value indicates seawater to air volatilization, while a negative  $F$  means that deposition is dominating air-sea exchange flux.

#### **Text S4. Atmospheric particle deposition**

Atmospheric deposition is one of the key processes that remove pollutants from air and is considered the major source of organic matter and chemical pollutants into the marine environment. Based on the concentrations of

PAEs measured in the particle phase, the particle-bound dry deposition fluxes ( $F_D$ , ng/m<sup>2</sup>/day) were calculated via equation (6)<sup>6</sup>:

$$F_D = C_p \times V_d \quad (6)$$

where  $C_p$  is the concentrations of particle phase PAEs (ng/m<sup>3</sup>), and  $V_d$  is the deposition velocity (cm/s), which can be used to estimate the deposition fluxes of air pollutants. In this work, we used the dry deposition velocity of 0.2 cm/s, which was estimated for pollutants concentrated in fine particles over the South China Sea.<sup>8</sup>

### **Text S5. Pearson correlation analysis**

A correlation analysis of PAEs in air and seawater was conducted. Pearson correlation coefficient values of DiBP and DnBP ( $p < 0.01$ ,  $r \geq 0.951$ ), and DMP and DEP ( $p < 0.01$ ,  $r \geq 0.647$ ) (Table S14) indicated significant correlations between them, and can be attributed to similar sources and transport pathways. DEHP did not show any correlation with other PAEs. In seawater, DEP was highly correlated with DMP ( $p < 0.01$ ,  $r \geq 0.659$ ), BBP ( $p < 0.01$ ,  $r \geq 0.578$ ) and DEHP ( $p < 0.01$ ,  $r \geq 0.578$ ) (Table S15), and DEHP had a correlation with most other PAEs, except from DCHP. We suppose that PAEs have uniform sources for the seawater, while PAEs in air might be affected by their original sources, monsoon, and atmospheric degradation and precipitation.

Figure S1. Air sampling stations in the South China Sea, with the blue dots marked at the starting position of each air sample

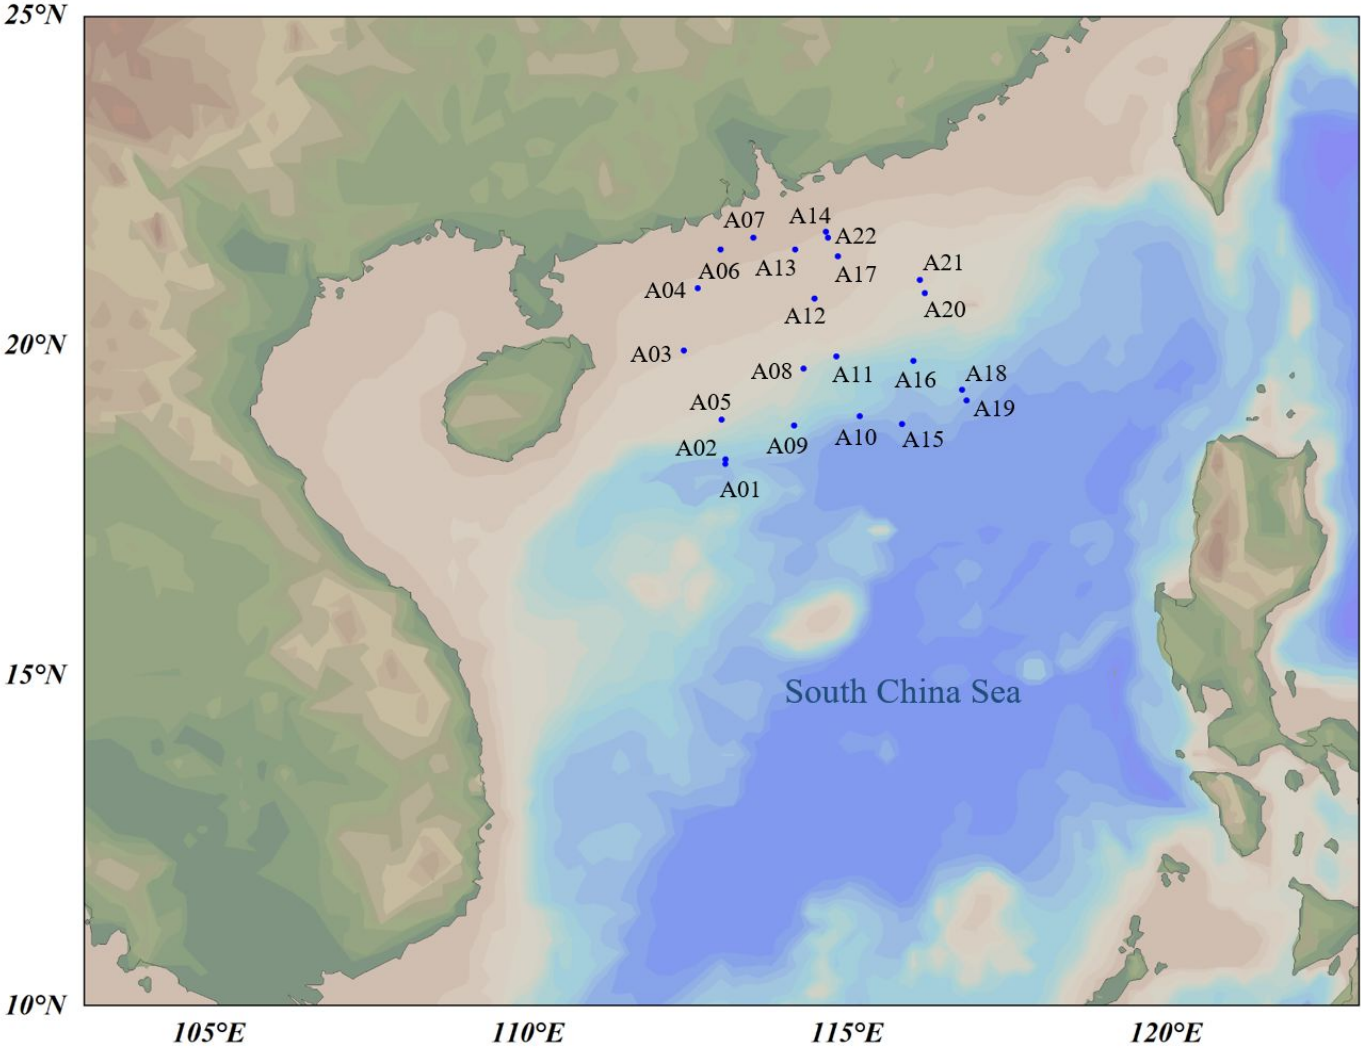



Figure S2. (A) Seawater sampling stations in the South China Sea, with the black dots marked at the starting position of each water sample. The color map shows the salinity profile in surface seawater; (B) general water mass circulation in the research area in summer

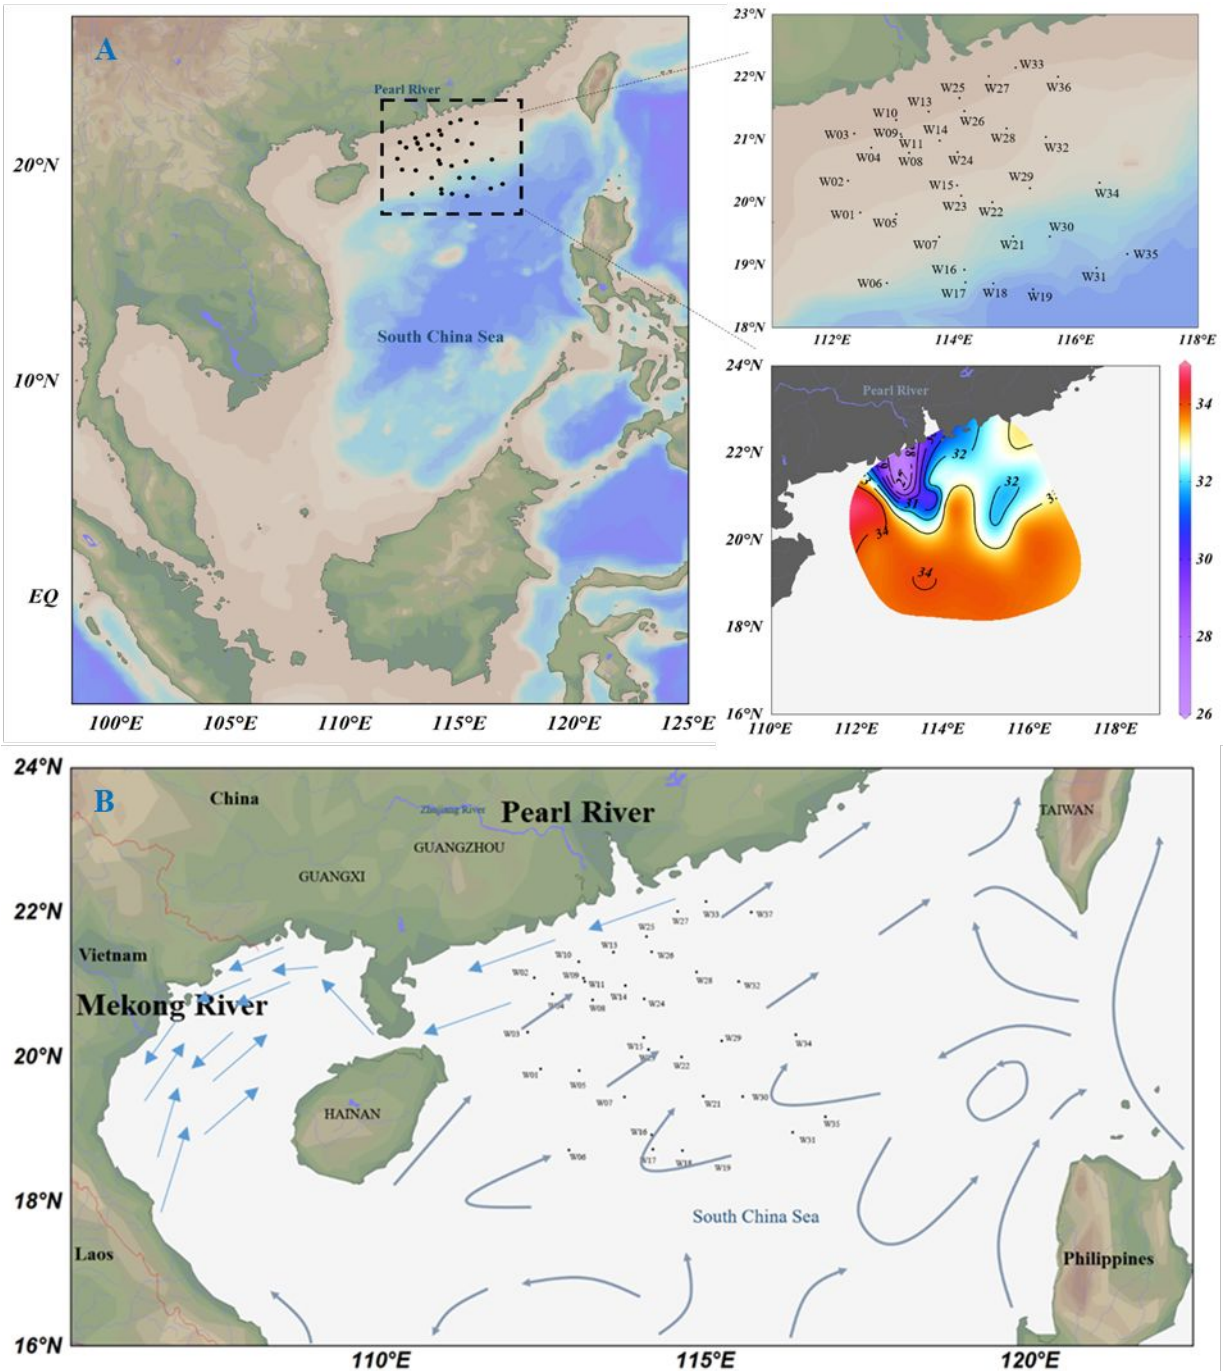

**Figure S3A.** High-volume air sampler is equipped with quartz fiber filter for atmospheric particles and a PUF/XAD-2 column for gaseous phase. The air sampler is placed at the upper deck and operated with headwind. The Filter and PUF-XAD-2 column are changed at sampling site. The PUF/XAD-2 column can be sealed with glass caps immediately after disconnected from the sampler to eliminate exposure time to the indoor air. The Quartz fiber filter is wrapped in a clean aluminum. PUF/XAD2 columns and filters are stored at  $-20^{\circ}\text{C}$ ;

**S3B:** The set-up of high-volume water sampler equipped with glass fiber filter and a XAD-2 column. The high-volume water sampler is connected to the ship-intake system with metal tubing. A glass fiber filter is closed in the filter holder to collect suspended particular matters and a XAD-2 column to retain organic chemicals in the dissolved phase. The seawater flows over the entire system at a flow rate of 0.2-1 L/min. The XAD-2 column is sealed with clips immediately after the sampling, and stored at  $5^{\circ}\text{C}$ . Glass fiber filter is wrapped in a clean aluminum foil and stored at  $-20^{\circ}\text{C}$

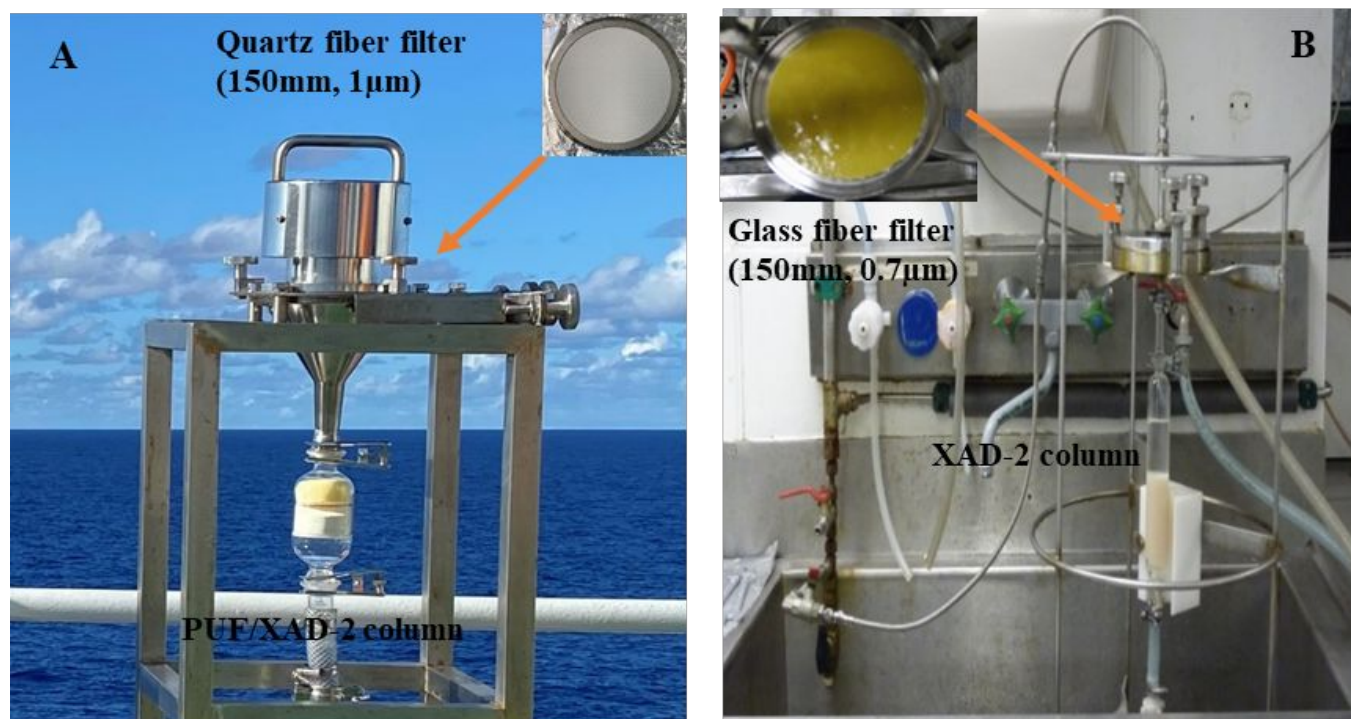

Figure S4. Air mass back trajectories of air samples. Colors indicate the origin of the air mass parcels

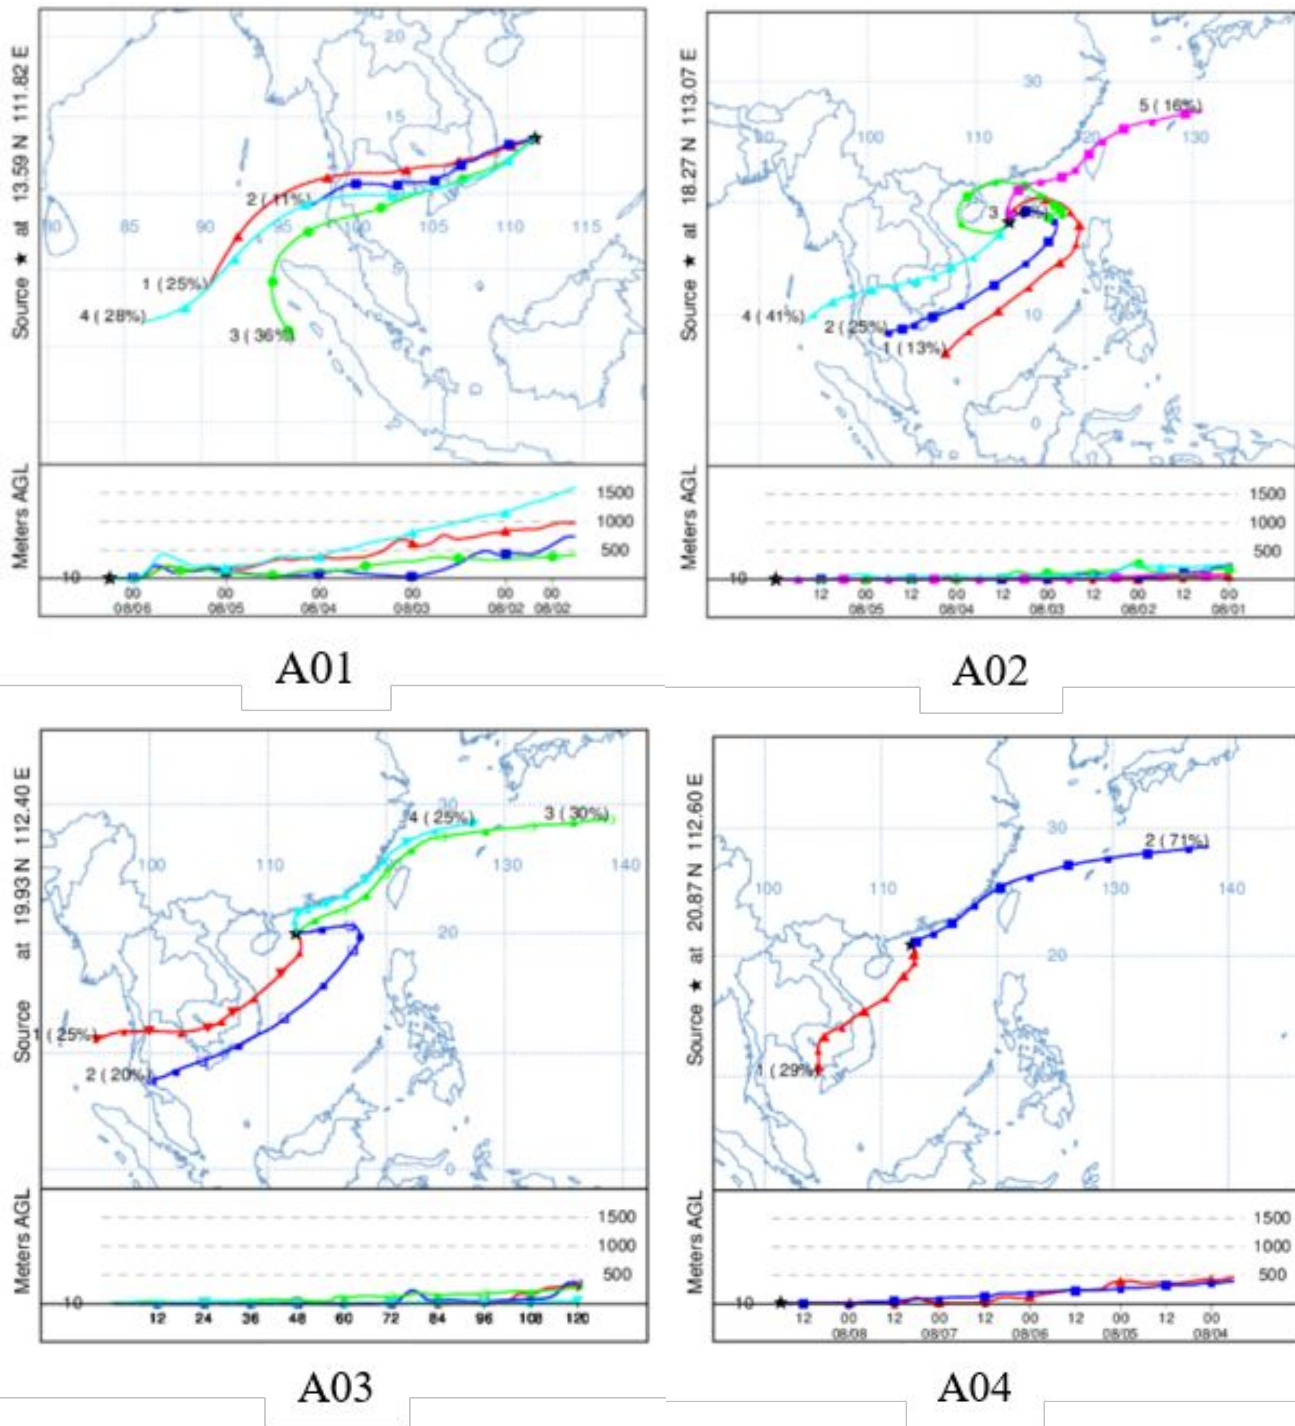



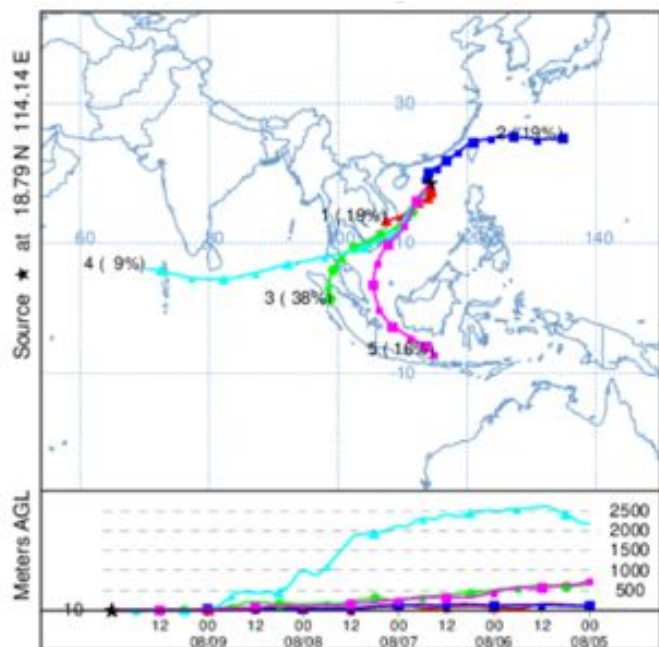

A09

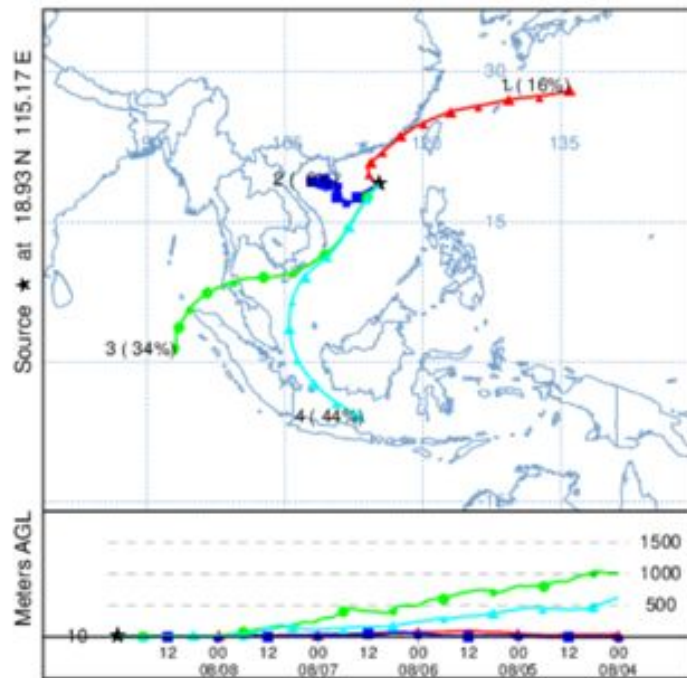

A10

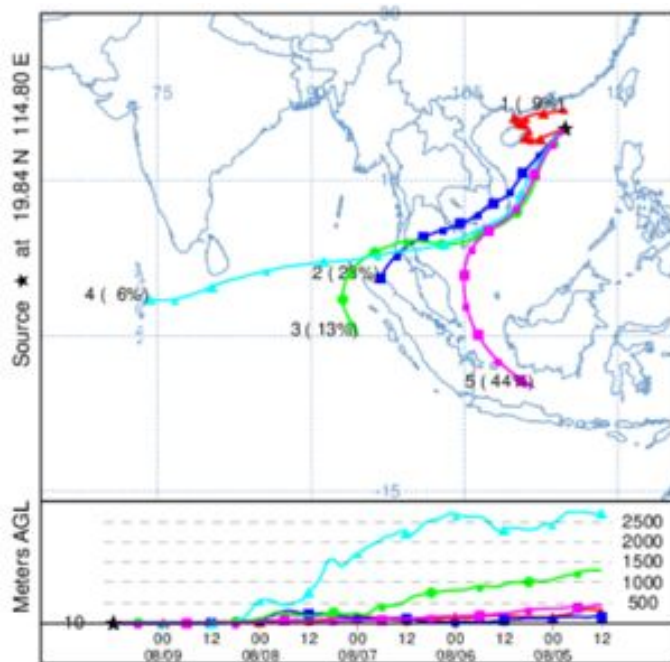

A11

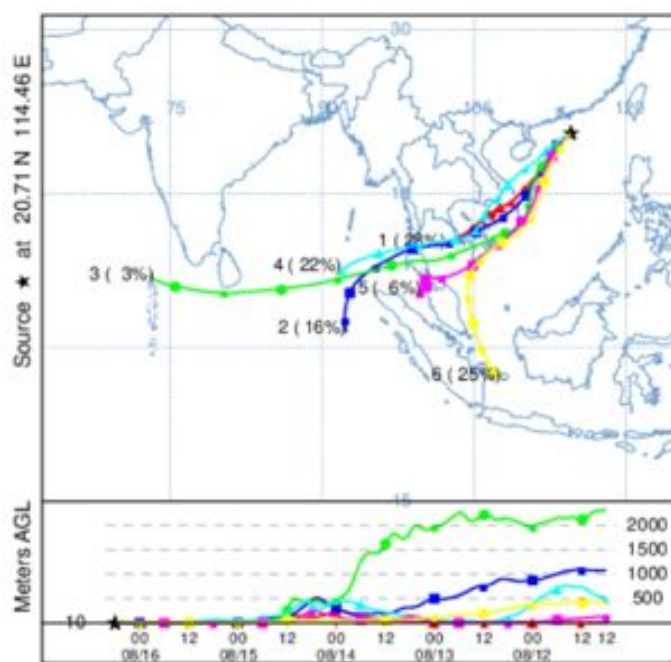

A12

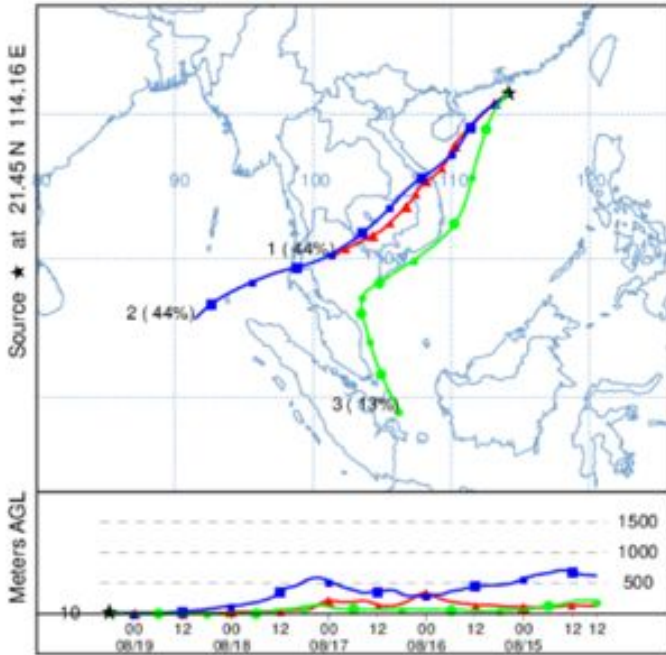

A13

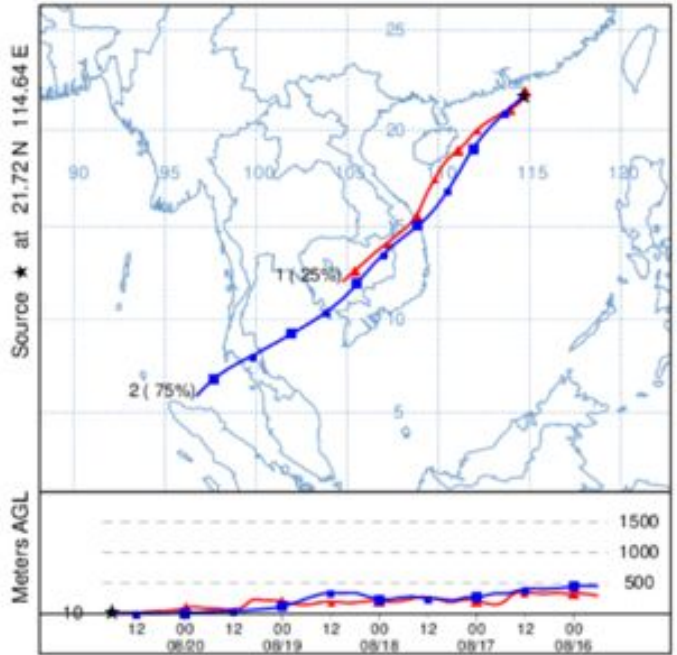

A14

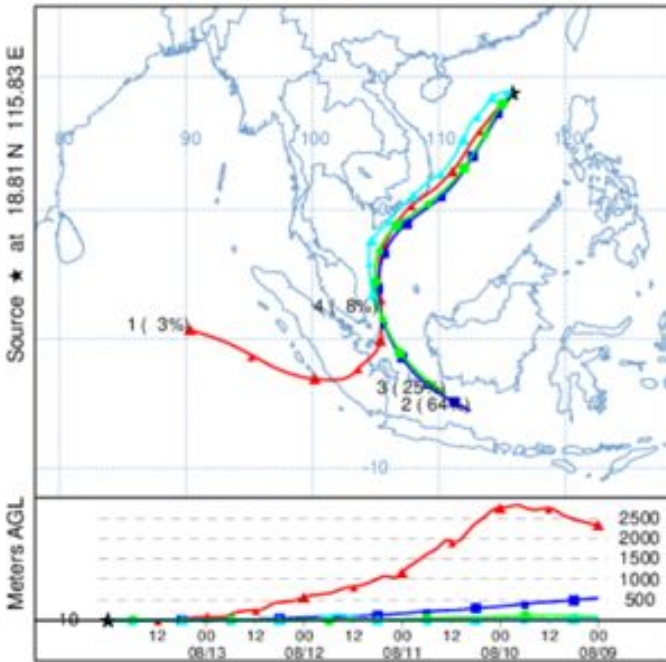

A15

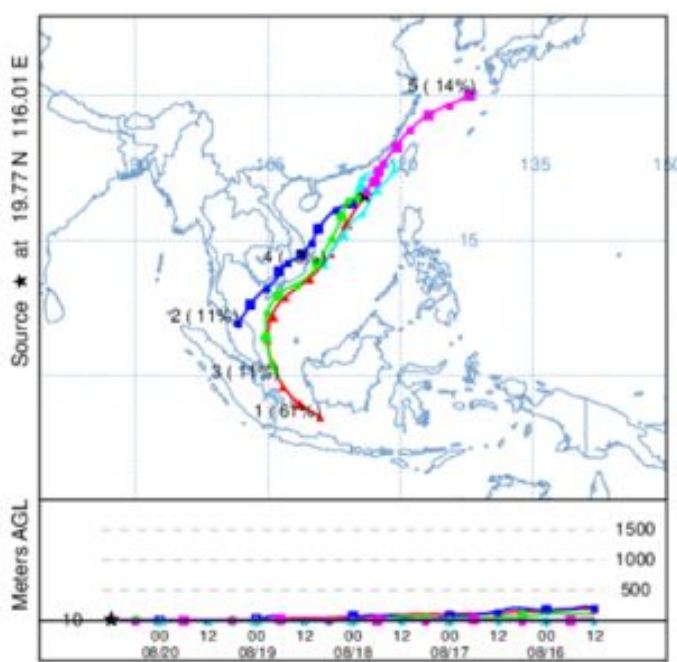

A16

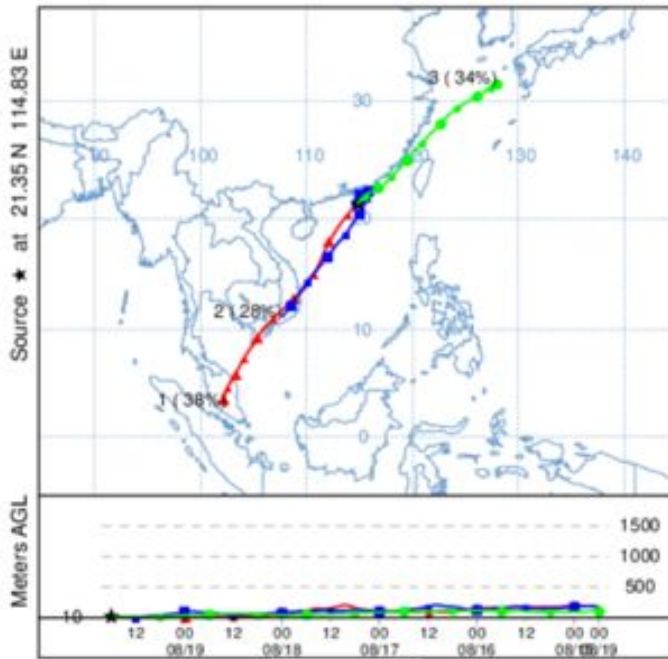

A17

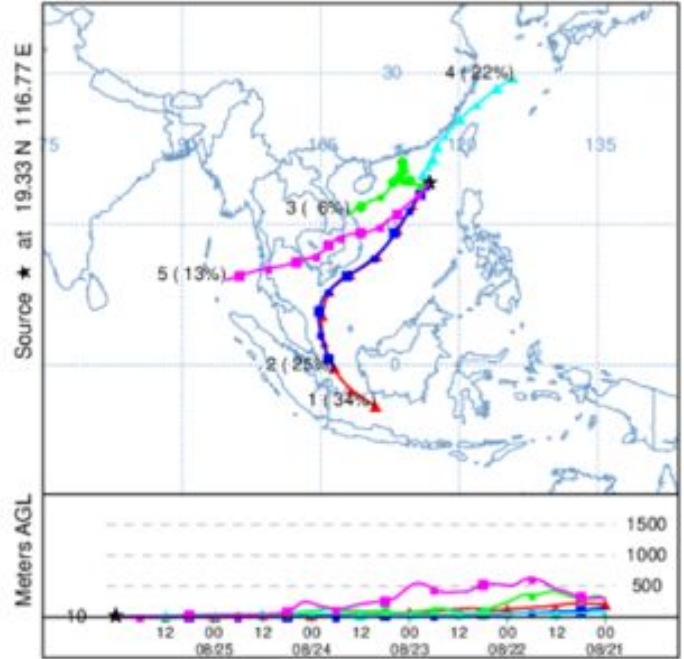

A18

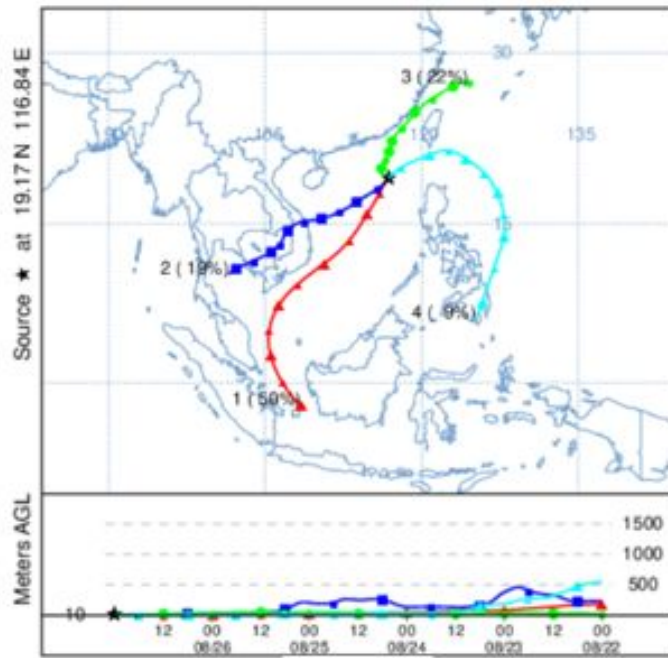

A19

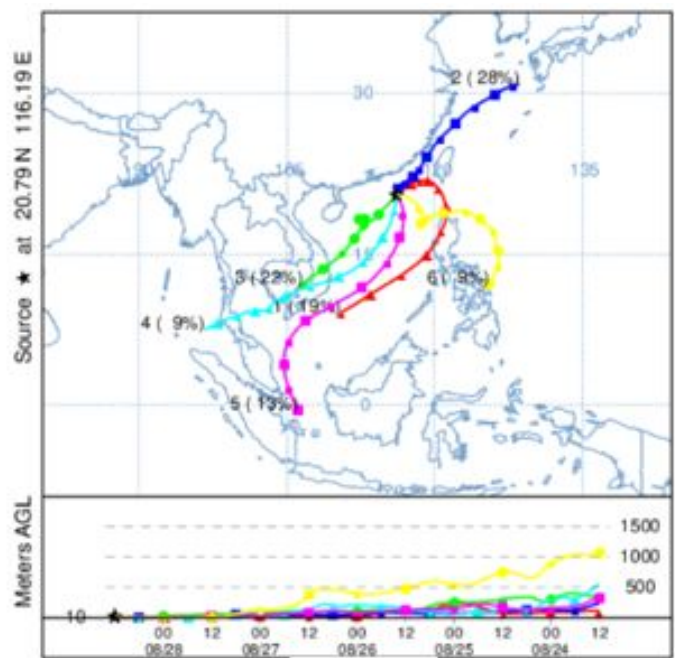

A20





Figure S5. The schematic diagrams of the flow field of the South China Sea in 7<sup>th</sup> (A) 13<sup>th</sup> (B), 19<sup>th</sup> (C) and 25<sup>th</sup> (D) of August 2019

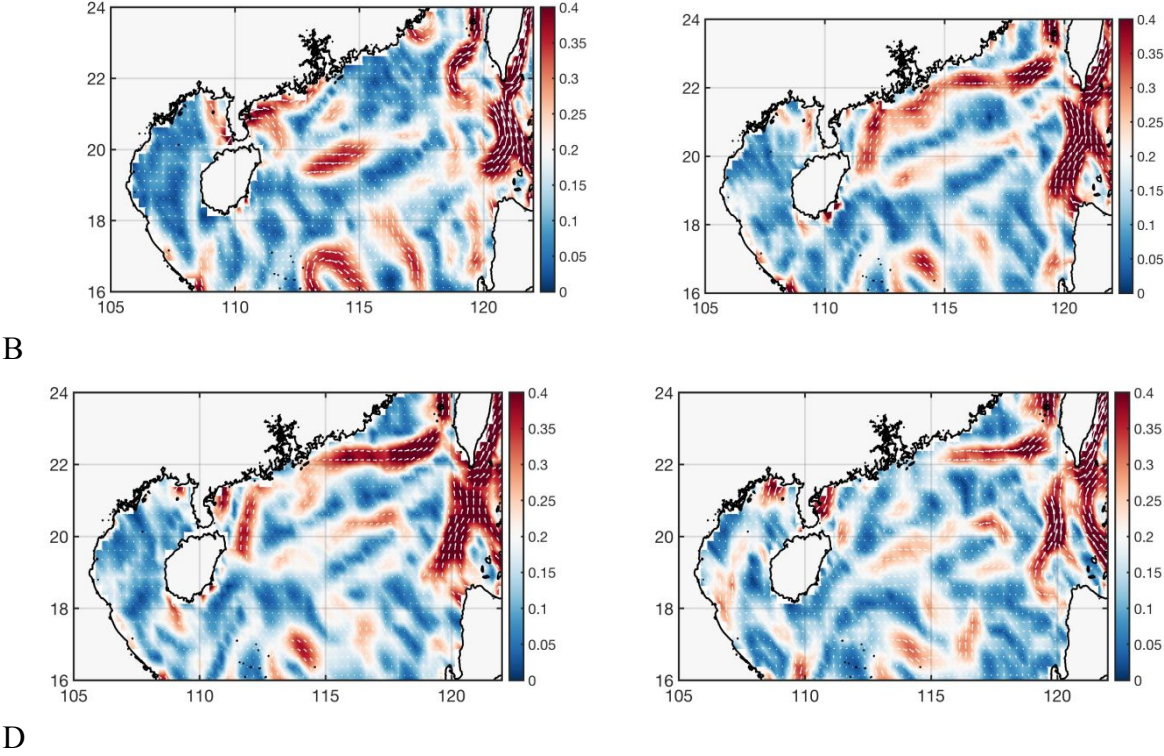

Table S 1. Detail information for air sampling

| Air sample | Latitude (North, degree) | Longitude (East, degree) | Sampling Date | Time  | Volume (m <sup>3</sup> ) | Air temperature (°C) | Humidity (%) | Wind speed (m/s) | Wind direction (degree) |
|------------|--------------------------|--------------------------|---------------|-------|--------------------------|----------------------|--------------|------------------|-------------------------|
| A01        | 13.589                   | 111.820                  | 5-Aug-2019    | 0:37  | 382                      | 29.1                 | 73.8         | 11.3             | 244.5                   |
| A02        | 18.278                   | 113.070                  | 6-Aug-2019    | 7:30  | 373                      | 29                   | 82.4         | 9.9              | 336.8                   |
| A03        | 19.927                   | 112.414                  | 7-Aug-2019    | 11:08 | 293                      | 28.8                 | 83.7         | 7.2              | 50.2                    |
| A04        | 20.867                   | 112.632                  | 8-Aug-2019    | 10:37 | 269                      | 29.2                 | 80.8         | 4.8              | 232.2                   |
| A05        | 18.875                   | 112.997                  | 9-Aug-2019    | 11:28 | 326                      | 29.5                 | 82.7         | 6.3              | 205                     |
| A06        | 21.453                   | 112.986                  | 11-Aug-2019   | 11:03 | 341                      | 29.6                 | 83.4         | 8.2              | 219.5                   |
| A07        | 21.631                   | 113.505                  | 12-Aug-2019   | 11:03 | 348                      | 29.6                 | 84.5         | 8.2              | 221.6                   |
| A08        | 19.651                   | 114.290                  | 13-Aug-2019   | 10:12 | 344                      | 29.6                 | 84.2         | 8.4              | 219.1                   |
| A09        | 18.787                   | 114.142                  | 14-Aug-2019   | 10:54 | 280                      | 29.7                 | 75.3         | 8.9              | 229.6                   |
| A10        | 18.926                   | 115.167                  | 15-Aug-2019   | 10:54 | 316                      | 29.2                 | 82.8         | 11.1             | 201.3                   |
| A11        | 19.839                   | 114.797                  | 16-Aug-2019   | 10:54 | 278                      | 29.6                 | 83           | 7.5              | 198.8                   |
| A12        | 20.708                   | 114.456                  | 17-Aug-2019   | 11:05 | 645                      | 29.4                 | 83.8         | 7.6              | 214.4                   |
| A13        | 21.452                   | 114.160                  | 19-Aug-2019   | 10:39 | 290                      | 29.4                 | 74.8         | 6                | 223                     |
| A14        | 21.720                   | 114.644                  | 20-Aug-2019   | 11:00 | 535                      | 28.6                 | 74.4         | 8.3              | 94.3                    |
| A15        | 18.813                   | 115.830                  | 22-Aug-2019   | 10:39 | 339                      | 26.6                 | 87           | 9.7              | 314.9                   |
| A16        | 19.766                   | 116.008                  | 23-Aug-2019   | 11:46 | 356                      | 28.9                 | 80.3         | 3.4              | 26                      |
| A17        | 21.351                   | 114.831                  | 24-Aug-2019   | 11:46 | 504                      | 30.3                 | 79.9         | 12.5             | 242.3                   |
| A18        | 19.332                   | 116.770                  | 26-Aug-2019   | 11:00 | 310                      | 29.2                 | 81.7         | 3.9              | 141.6                   |
| A19        | 19.166                   | 116.840                  | 27-Aug-2019   | 11:00 | 531                      | 28.7                 | 81.7         | 7.2              | 35.3                    |
| A20        | 20.791                   | 116.190                  | 29-Aug-2019   | 11:00 | 345                      | 28.5                 | 81.3         | 7.8              | 124.7                   |
| A21        | 20.993                   | 116.111                  | 30-Aug-2019   | 11:06 | 313                      | 28.5                 | 78.1         | 4.6              | 108.8                   |
| A22        | 21.630                   | 114.665                  | 31-Aug-2019   | 11:15 | 300                      | 28.7                 | 79.4         | 7.9              | 81.5                    |

Table S 2. Detail information for seawater sampling

| Seawater Sample | Latitude (North, degree) | Longitude (East, degree) | Sampling Date | Volume (L) | Ta (°C) | Tw (°C) | Conductivity (S/m) | Depth (m) |
|-----------------|--------------------------|--------------------------|---------------|------------|---------|---------|--------------------|-----------|
| W01             | 19.83                    | 112.45                   | 7-Aug-2019    | 100        | 28.8    | 29.9    | 5.64               | 113.2     |
| W02             | 20.34                    | 112.25                   | 7-Aug-2019    | 135        | 28.5    | 29.6    | 5.65               | 83.4      |
| W03             | 21.09                    | 112.35                   | 8-Aug-2019    | 171        | 29      | 29.4    | 5.64               | 48.8      |
| W04             | 20.87                    | 112.63                   | 8-Aug-2019    | 178        | 29.4    | 29.6    | 5.67               | 60        |
| W05             | 19.81                    | 113.04                   | 9-Aug-2019    | 193        | 29.4    | 30      | 5.67               | 154       |
| W06             | 18.71                    | 112.89                   | 9-Aug-2019    | 177        | 29.4    | 30      | 5.67               | 900       |
| W07             | 19.45                    | 113.75                   | 10-Aug-2019   | 244        | 29.8    | 29.8    | 5.67               | 472.5     |
| W08             | 20.78                    | 113.25                   | 10-Aug-2019   | 196        | 29.3    | 30      | 5.4                | 81.1      |
| W09             | 21.09                    | 113.12                   | 11-Aug-2019   | 36         | 29.8    | 30.3    | 4.74               | 60        |
| W10             | 21.31                    | 113.04                   | 11-Aug-2019   | 169        | 29.8    | 29.8    | 4.57               | 42        |
| W11             | 21.04                    | 113.13                   | 12-Aug-2019   | 84         | 30.3    | 30.4    | 4.98               | 44.3      |
| W12             | 21.04                    | 113.13                   | 12-Aug-2019   | 119        | 30.3    | 30.4    | 4.98               | 44.3      |
| W13             | 21.44                    | 113.57                   | 12-Aug-2019   | 68         | 29.7    | 29.6    | 5.18               | 42.2      |
| W14             | 20.98                    | 113.75                   | 12-Aug-2019   | 105        | 29.7    | 30.4    | 4.83               | 85.6      |
| W15             | 20.27                    | 114.04                   | 13-Aug-2019   | 310        | 29.8    | 29.6    | 5.58               | 121.4     |
| W16             | 18.92                    | 114.16                   | 13-Aug-2019   | 199        | 29.5    | 29.8    | 5.66               | 1348.3    |
| W17             | 18.72                    | 114.18                   | 14-Aug-2019   | 198        | 29.5    | 29.8    | 5.66               | 1859.1    |
| W18             | 18.70                    | 114.64                   | 14-Aug-2019   | 126        | 29.2    | 29.7    | 5.65               | 3510      |
| W19             | 18.61                    | 115.29                   | 15-Aug-2019   | 247        | 29.2    | 29.4    | 5.62               | 3694.5    |
| W21             | 19.45                    | 114.96                   | 16-Aug-2019   | 195        | 29.9    | 29.7    | 5.62               | 1469.2    |
| W22             | 20.00                    | 114.62                   | 16-Aug-2019   | 195        | 27.7    | 29.7    | 5.58               | 1469.2    |
| W23             | 20.10                    | 114.11                   | 17-Aug-2019   | 165        | 29.6    | 29.8    | 5.61               | 187.5     |
| W24             | 20.80                    | 114.05                   | 18-Aug-2019   | 165        | 29.6    | 30      | 5.68               | 89        |
| W25             | 21.66                    | 114.08                   | 18-Aug-2019   | 217        | 27.7    | 29.6    | 5.45               | 51        |
| W26             | 21.45                    | 114.16                   | 19-Aug-2019   | 210        | 29.2    | 29.9    | 5.42               | 55        |
| W27             | 22.01                    | 114.56                   | 20-Aug-2019   | 143        | 28.4    | 29.2    | 5.3                | 40        |
| W28             | 21.17                    | 114.85                   | 20-Aug-2019   | 158        | 28.4    | 29.7    | 5.46               | 95        |
| W29             | 20.22                    | 115.24                   | 21-Aug-2019   | 185        | 26.7    | 29.4    | 5.35               | 468       |
| W30             | 19.45                    | 115.56                   | 22-Aug-2019   | 258        | 28.7    | 29.3    | 5.56               | 2490      |
| W31             | 18.95                    | 116.33                   | 23-Aug-2019   | 240        | 28.8    | 29.4    | 5.61               | 2732      |
| W32             | 21.04                    | 115.5                    | 24-Aug-2019   | 220        | 29.4    | 29.8    | 5.34               | 125       |
| W33             | 22.14                    | 115                      | 25-Aug-2019   | 250        | 27.5    | 29.9    | 5.44               | 51.8      |
| W34             | 20.31                    | 116.38                   | 26-Aug-2019   | 138        | 29.2    | 29.4    | 5.58               | 961       |
| W35             | 19.17                    | 116.84                   | 26-Aug-2019   | 180        | 29.2    | 29.5    | 5.6                | 3339      |
| W36             | 19.17                    | 116.84                   | 27-Aug-2019   | 35         | 29.5    | 29.6    | 5.6                | 3340      |
| W37             | 22.00                    | 115.7                    | 31-Aug-2019   | 100        | 29.2    | 29.9    | 5.54               | 80        |

Table S 3. Physiochemical properties of seven phthalate esters<sup>9</sup>

| Chemical Name               | Abbreviation | CAS      | MW     | Chemical formula                               | V <sub>p</sub><br>(Pa) | S<br>(mg/L)           | H<br>(pa.m <sup>3</sup> /mol) | logK <sub>ow</sub> | logK <sub>oa</sub> | logK <sub>aw</sub> | Half-life<br>time in air<br>(d) | Chemical<br>structure                                                                 |
|-----------------------------|--------------|----------|--------|------------------------------------------------|------------------------|-----------------------|-------------------------------|--------------------|--------------------|--------------------|---------------------------------|---------------------------------------------------------------------------------------|
| Dimethyl phthalate          | DMP          | 131-11-3 | 194.19 | C <sub>10</sub> H <sub>10</sub> O <sub>4</sub> | 0.263                  | 5220                  | 9.78x10 <sup>-3</sup>         | 1.61               | 7.01               | -5.4               | 14.4                            | 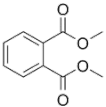   |
| Diethyl phthalate           | DEP          | 84-66-2  | 222.24 | C <sub>12</sub> H <sub>14</sub> O <sub>4</sub> | 6.48x10 <sup>-2</sup>  | 591                   | 2.44x10 <sup>-2</sup>         | 2.54               | 7.55               | -5.01              | 2.39                            |    |
| Diisobutyl phthalate        | DiBP         | 84-69-5  | 278.35 | C <sub>16</sub> H <sub>22</sub> O <sub>4</sub> | 4.73x10 <sup>-3</sup>  | 9.9                   | 0.13                          | 4.27               | 8.54               | -4.27              | 0.58                            |    |
| Dibutyl phthalate           | DnBP         | 84-74-2  | 278.34 | C <sub>16</sub> H <sub>22</sub> O <sub>4</sub> | 4.73x10 <sup>-3</sup>  | 9.9                   | 0.13                          | 4.27               | 8.54               | -4.27              | 0.89                            |    |
| Benzylbutyl phthalate       | BBP          | 85-68-7  | 312.37 | C <sub>19</sub> H <sub>20</sub> O <sub>4</sub> | 2.49x10 <sup>-3</sup>  | 3.8                   | 0.205                         | 4.70               | 8.78               | -4.08              | 0.75                            |    |
| Dicyclohexyl phthalate      | DCHP         | 84-61-7  | 330.42 | C <sub>20</sub> H <sub>26</sub> O <sub>4</sub> | 6.1x10 <sup>-4</sup>   | 4.1x10 <sup>-2</sup>  | 4.92                          | 6.2                | 11.59              | -5.39              | 0.22                            |   |
| Bis(2-ethylhexyl) phthalate | DEHP         | 117-81-7 | 390.56 | C <sub>24</sub> H <sub>38</sub> O <sub>4</sub> | 2.52x10 <sup>-5</sup>  | 2.49x10 <sup>-3</sup> | 3.95                          | 7.73               | 10.53              | -2.80              | 0.38                            |  |

V<sub>p</sub>: vapor pressure at 25°C; S: water solubility at 25°C; H: Henry's law constants at 25°C; logK<sub>ow</sub>: log Octanol-Air coefficient at 25°C; logK<sub>oa</sub>: log Octanol-Air coefficient at 25°C; logK<sub>aw</sub>: log air-water transfer coefficient; Half-life time in air (d) (exclude DiBP and DCHP)<sup>10</sup>; Half-life time in air for DiBP and DCHP: (Calculated by EPIWEB 4.1). Physiochemical properties of DCHP was Calculated with EPIWEB 4.1.

Table S 4. Information about the chemicals and material applied in this work

| <b>Chemical and material</b>                                                                              | <b>Description</b>     | <b>Supplier</b>                    |
|-----------------------------------------------------------------------------------------------------------|------------------------|------------------------------------|
| Dichloromethane                                                                                           | Pico grade             | Promochem, Wesel, Germany          |
| n-Hexane                                                                                                  | Pico grade             | Promochem, Wesel, Germany          |
| Methanol                                                                                                  | Pico grade             | Promochem, Wesel, Germany          |
| Acetone                                                                                                   | Pico grade             | Promochem, Wesel, Germany          |
| Dimethyl phthalate-3,4,5,6-d4                                                                             | Ring-d4, 98%, 100µg/mL | LGC, Wesel, Germany                |
| Diethyl phthalate-3,4,5,6-d4                                                                              | Ring-d4, 98%, 100µg/mL | LGC, Wesel, Germany                |
| Dibutyl phthalate-3,4,5,6-d4                                                                              | Ring-d4, 98%, 100µg/mL | LGC, Wesel, Germany                |
| Bis(2-ethylhexyl)phthalate-3,4,5,6-d4                                                                     | Ring-d4, 98%, 100µg/mL | LGC, Wesel, Germany                |
| 2, 2',3,3',4,5,5',6,6'-<br>Nonachlorobiphenyl (13C12)                                                     | 99%, 2µg/mL            | Cambridge Isotope Laboratories, UK |
| Phthalate esters Analytes Mix 3<br>Content: DMP, DEP, DiBP, DnBP,<br>BBP, DCHP, DEHP and other 10<br>PAEs | 1000µg/mL              | LGC, Wesel, Germany                |
| Silica gel                                                                                                | 0.063-0.2mm            | Macherey Nagel, Düren, Germany     |
| Anhydrous sodium sulphate                                                                                 | 99%                    | Merck, Darmstadt, Germany          |
| Amberlite XAD-2                                                                                           | 20-60 mesh             | Merck, Darmstadt, Germany          |

Table S 5. Agilent 7890 GC-MS/MS conditions

| Parameter                      | Value                                                                                                                                                                                                                        |
|--------------------------------|------------------------------------------------------------------------------------------------------------------------------------------------------------------------------------------------------------------------------|
| Analytical column              | 2 set Agilent HP5-ms, 250 $\mu\text{m}$ $\times$ 15 m, 0.25 $\mu\text{m}$                                                                                                                                                    |
| Sample injection mode          | 1 $\mu\text{L}$ Pulsed splitless using Multimode Inlet (MMI)                                                                                                                                                                 |
| Injection port liner           | Agilent 200 $\mu\text{L}$ dimpled, single-taper liner                                                                                                                                                                        |
| Injection temperature program  | 20 $^{\circ}\text{C}$ (0.2 minutes), 300 $^{\circ}\text{C}/\text{min}$ to 300 $^{\circ}\text{C}$                                                                                                                             |
| Injection pulsed pressure      | 25 psi (1.9 minutes)                                                                                                                                                                                                         |
| Purge flow to spit vent        | 50 mL/min (2.0 minutes)                                                                                                                                                                                                      |
| Carrier gas                    | Helium                                                                                                                                                                                                                       |
| Carrier gas flow               | 1.2 mL/min                                                                                                                                                                                                                   |
| Oven temperature program       | 50 $^{\circ}\text{C}$ for 2 min, 20 $^{\circ}\text{C}/\text{min}$ to 80 $^{\circ}\text{C}$ , 5 $^{\circ}\text{C}/\text{min}$ to 250 $^{\circ}\text{C}$ , 15 $^{\circ}\text{C}/\text{min}$ to 300 $^{\circ}\text{C}$ (14 min) |
| Post run                       | 310 $^{\circ}\text{C}$ for 3 min                                                                                                                                                                                             |
| Backflush                      | 3.0 ml/min                                                                                                                                                                                                                   |
| Mass spectrometer              | Agilent 7000C with electron impact ionization source operated in multiple reaction monitoring mode (MRM)                                                                                                                     |
| Ionization mode                | Positive                                                                                                                                                                                                                     |
| Source temperature             | 280 $^{\circ}\text{C}$                                                                                                                                                                                                       |
| Quadrupole 1 and 2 temperature | 150 $^{\circ}\text{C}$                                                                                                                                                                                                       |
| Transfer line temperature      | 280 $^{\circ}\text{C}$                                                                                                                                                                                                       |

Table S 6. Detail information for the determination of PAEs using GC-MS/MS

| <b>PAE</b>     | <b>Quantifier ions<br/>(m/z)</b> | <b>Qualifier ions<br/>(m/z)</b> | <b>Collision energy<br/>(eV)</b> | <b>Retention time<br/>(min)</b> | <b>Instrumental<br/>detection limit(pg)</b> |
|----------------|----------------------------------|---------------------------------|----------------------------------|---------------------------------|---------------------------------------------|
| <b>DMP</b>     | 163>77                           | 163>135                         | 15                               | 16.963                          | 0.02                                        |
| <b>DEP</b>     | 149>93                           | 149>121                         | 15                               | 20.258                          | 0.03                                        |
| <b>DiBP</b>    | 149>93                           | 149>121                         | 15                               | 26.105                          | 0.04                                        |
| <b>DnBP</b>    | 149>93                           | 149>121                         | 15                               | 27.956                          | 0.04                                        |
| <b>BBP</b>     | 149>93                           | 149>121                         | 15                               | 34.854                          | 0.1                                         |
| <b>DCHP</b>    | 149>93                           | 149>121                         | 15                               | 37.532                          | 0.1                                         |
| <b>DEHP</b>    | 149>93                           | 149>121                         | 15                               | 37.955                          | 0.2                                         |
| <b>d4-DMP</b>  | 167>81                           | 167>139                         | 15                               | 16.933                          | -                                           |
| <b>d4-DEP</b>  | 153>97                           | 153>125                         | 15                               | 20.232                          | -                                           |
| <b>d4-DnBP</b> | 153>97                           | 153>125                         | 15                               | 27.937                          | -                                           |
| <b>d4-DEHP</b> | 153>97                           | 153>125                         | 15                               | 37.943                          | -                                           |

Table S 7. The field blanks and the method detection limits of PAEs in PUF/XAD-2, XAD-2 columns, QFF and GFF filters

| Sample material | PUF/XAD-2 column (gas)               |                          | QFF (particle)                       |                          | XAD-2 column (dissolved phase) |            | GFF (particular matter) |            |
|-----------------|--------------------------------------|--------------------------|--------------------------------------|--------------------------|--------------------------------|------------|-------------------------|------------|
|                 | Blank (mean±SD) (ng/m <sup>3</sup> ) | MDL (ng/m <sup>3</sup> ) | Blank (mean±SD) (ng/m <sup>3</sup> ) | MDL (ng/m <sup>3</sup> ) | Blank (mean±SD) (ng/L)         | MDL (ng/L) | Blank (mean±SD) (ng/L)  | MDL (ng/L) |
| <b>DMP</b>      | 0.017±0.006                          | 0.036                    | 0.002±0.001                          | 0.004                    | 0.002±0.001                    | 0.004      | 0.005±0.002             | 0.011      |
| <b>DEP</b>      | 0.014±0.002                          | 0.022                    | 0.008±0.004                          | 0.021                    | 0.008±0.004                    | 0.021      | 0.021±0.008             | 0.045      |
| <b>DiBP</b>     | 0.020±0.007                          | 0.042                    | 0.005±0.001                          | 0.007                    | 0.005±0.001                    | 0.007      | 0.045±0.011             | 0.077      |
| <b>DnBP</b>     | 0.037±0.011                          | 0.068                    | 0.006±0.002                          | 0.011                    | 0.006±0.002                    | 0.011      | 0.015±0.001             | 0.017      |
| <b>BBP</b>      | 0.060±0.010                          | 0.090                    | 0.001±0.000                          | 0.001                    | 0.001±0.000                    | 0.001      | 0.001±0.001             | 0.002      |
| <b>DCHP</b>     | 0.001±0.000                          | 0.002                    | 0.001±0.000                          | 0.001                    | 0.001±0.000                    | 0.001      | 0.001±0.000             | 0.001      |
| <b>DEHP</b>     | 0.14±0.002                           | 0.15                     | 0.074±0.031                          | 0.166                    | 0.074±0.031                    | 0.17       | 0.17±0.099              | 0.47       |



Table S 8. Concentrations of PAEs in the atmosphere over the South China Sea. The MDLs of PAEs calculated with individual sampling volumes are given in brackets for the calculated concentrations less than MDLs.

| Air sample                                | DMP  | DEP  | DiBP  | DnBP | BBP (MDL)      | DCHP (MDL)    | DEHP | $\Sigma_7$ PAEs |
|-------------------------------------------|------|------|-------|------|----------------|---------------|------|-----------------|
| <b>Gaseous phase</b>                      |      |      |       |      |                |               |      |                 |
| <b>(C<sub>g</sub>, ng/m<sup>3</sup>)</b>  |      |      |       |      |                |               |      |                 |
| A01                                       | 0.45 | 0.10 | 1.37  | 0.94 | 0.02 (0.09)    | 0.00 (0.002)  | 2.80 | 5.68            |
| A02                                       | 0.26 | 0.25 | 0.74  | 0.34 | 0.06 (0.09)    | 0.00 (0.002)  | 1.42 | 3.07            |
| A03                                       | 1.60 | 0.14 | 2.93  | 2.13 | 0.09 (0.11)    | 0.002         | 0.47 | 7.36            |
| A04                                       | 0.89 | 0.17 | 3.46  | 2.48 | 0.03 (0.12)    | 0.024         | 0.86 | 7.91            |
| A05                                       | 0.45 | 0.26 | 1.46  | 1.13 | 0.03 (0.10)    | 0.005         | 0.68 | 4.00            |
| A06                                       | 0.27 | 0.13 | 0.58  | 0.57 | 0.07 (0.10)    | 0.001 (0.002) | 0.67 | 2.28            |
| A07                                       | 0.32 | 0.17 | 1.93  | 1.63 | 0.03 (0.09)    | 0.003         | 0.70 | 4.78            |
| A08                                       | 0.15 | 0.06 | 0.29  | 0.35 | 0.05 (0.10)    | 0.001 (0.002) | 0.46 | 1.37            |
| A09                                       | 0.35 | 0.13 | 1.15  | 0.82 | 0.02 (0.12)    | 0.013         | 0.63 | 3.12            |
| A10                                       | 0.19 | 0.06 | 0.15  | 0.09 | 0.03 (0.10)    | 0.001 (0.002) | 0.25 | 0.76            |
| A11                                       | 0.29 | 0.26 | 1.76  | 1.19 | 0.01 (0.12)    | 0.001 (0.003) | 0.50 | 4.00            |
| A12                                       | 0.28 | 0.14 | 4.02  | 2.90 | 0.08           | 0.006         | 0.36 | 7.79            |
| A13                                       | 0.68 | 0.15 | 2.31  | 1.81 | 0.08 (0.11)    | 0.002 (0.003) | 0.85 | 5.88            |
| A14                                       | 0.65 | 0.15 | 3.58  | 3.00 | 0.03 (0.06)    | 0.004         | 0.79 | 8.21            |
| A15                                       | 0.36 | 0.05 | 0.46  | 0.38 | 0.02 (0.10)    | 0.002         | 0.31 | 1.58            |
| A16                                       | 1.08 | 0.12 | 0.05  | 0.15 | 0.04 (0.09)    | 0.001 (0.002) | 0.22 | 1.68            |
| A17                                       | 1.53 | 0.39 | 1.50  | 1.96 | 0.02 (0.06)    | 0.002         | 1.08 | 6.48            |
| A18                                       | 0.12 | 0.06 | 1.10  | 0.78 | 0.07 (0.10)    | 0.001 (0.002) | 0.19 | 2.32            |
| A19                                       | 0.14 | 0.06 | 1.30  | 1.12 | 0.04 (0.06)    | 0.003         | 0.34 | 3.00            |
| A20                                       | 0.24 | 0.08 | 0.16  | 0.12 | 0.01 (0.10)    | 0.00 (0.002)  | 0.22 | 0.83            |
| A21                                       | 0.47 | 0.19 | 1.26  | 1.06 | 0.05 (0.10)    | 0.002         | 0.30 | 3.33            |
| A22                                       | 0.25 | 0.20 | 4.63  | 4.26 | 0.07 (0.10)    | 0.012         | 0.55 | 9.98            |
| Mean                                      | 0.50 | 0.15 | 1.64  | 1.33 | 0.04 (0.09)    | 0.00 (0.002)  | 0.67 | 4.34            |
| S.D.                                      | 0.42 | 0.08 | 1.33  | 1.10 | 0.03           | 0.01          | 0.57 | 2.70            |
| Median                                    | 0.34 | 0.14 | 1.33  | 1.09 | 0.03 (0.09)    | 0.00 (0.002)  | 0.52 | 3.67            |
| Max                                       | 1.60 | 0.39 | 4.63  | 4.26 | 0.09 (0.09)    | 0.02          | 2.80 | 9.98            |
| Min                                       | 0.12 | 0.05 | 0.05  | 0.09 | 0.01 (0.09)    | 0.00 (0.002)  | 0.19 | 0.76            |
| <b>Particle phase</b>                     |      |      |       |      |                |               |      |                 |
| <b>(C<sub>p</sub>, ng/m<sup>3</sup>)</b>  |      |      |       |      |                |               |      |                 |
| A01                                       | 0.01 | 0.02 | 0.01  | 0.02 | 0.0002 (0.001) | 0.000 (0.001) | 0.54 | 0.60            |
| A02                                       | 0.01 | 0.01 | 0.10  | 0.06 | 0.001          | 0.000 (0.001) | 1.15 | 1.32            |
| A03                                       | 0.09 | 0.21 | 8.08  | 5.31 | 0.001          | 0.0013        | 1.04 | 14.72           |
| A04                                       | 0.03 | 0.07 | 6.35  | 3.60 | 0.002          | 0.0102        | 0.49 | 10.56           |
| A05                                       | 0.02 | 0.08 | 5.08  | 2.74 | 0.000 (0.001)  | 0.0011        | 0.60 | 8.52            |
| A06                                       | 0.02 | 0.04 | 2.94  | 3.41 | 0.003          | 0.000 (0.001) | 0.39 | 6.81            |
| A07                                       | 0.01 | 0.04 | 0.36  | 1.65 | 0.005          | 0.0079        | 0.40 | 2.47            |
| A08                                       | 0.01 | 0.04 | 0.96  | 1.24 | 0.002          | 0.0025        | 0.31 | 2.56            |
| A09                                       | 0.02 | 0.07 | 2.87  | 2.63 | 0.002          | 0.0139        | 0.39 | 6.00            |
| A10                                       | 0.02 | 0.05 | 7.97  | 6.57 | 0.005          | 0.0015        | 0.73 | 15.34           |
| A11                                       | 0.01 | 0.05 | 3.05  | 3.54 | 0.003          | 0.0043        | 0.53 | 7.20            |
| A12                                       | 0.01 | 0.02 | 0.31  | 0.33 | 0.002          | 0.0012        | 0.23 | 0.90            |
| A13                                       | 0.03 | 0.03 | 0.36  | 0.48 | 0.001          | 0.0024        | 0.44 | 1.34            |
| A14                                       | 0.02 | 0.07 | 0.10  | 0.24 | 0.004          | 0.0051        | 0.50 | 0.93            |
| A15                                       | 0.02 | 0.14 | 3.20  | 2.38 | 0.008          | 0.0062        | 0.47 | 6.22            |
| A16                                       | 0.16 | 0.14 | 0.13  | 0.17 | 0.003          | 0.001 (0.001) | 0.55 | 1.16            |
| A17                                       | 0.01 | 0.06 | 0.15  | 0.23 | 0.003          | 0.0010        | 0.60 | 1.06            |
| A18                                       | 0.03 | 0.13 | 0.30  | 0.31 | 0.001          | 0.0005        | 0.68 | 1.46            |
| A19                                       | 0.01 | 0.02 | 0.01  | 0.03 | 0.000 (0.001)  | 0.0008        | 0.15 | 0.21            |
| A20                                       | 0.03 | 0.07 | 3.67  | 2.49 | 0.002          | 0.001 (0.001) | 0.32 | 6.58            |
| A21                                       | 0.04 | 0.20 | 10.50 | 9.44 | 0.005          | 0.020         | 0.80 | 21.00           |
| A22                                       | 0.01 | 0.03 | 0.04  | 0.06 | 0.000 (0.001)  | 0.001 (0.001) | 0.34 | 0.48            |
| Mean                                      | 0.03 | 0.07 | 2.57  | 2.13 | 0.002          | 0.004         | 0.53 | 5.34            |
| S.D.                                      | 0.03 | 0.06 | 3.17  | 2.47 | 0.002          | 0.005         | 0.24 | 5.73            |
| Median                                    | 0.02 | 0.06 | 0.66  | 1.44 | 0.002          | 0.001         | 0.50 | 2.51            |
| Max                                       | 0.16 | 0.21 | 10.50 | 9.44 | 0.008          | 0.020         | 1.15 | 21.00           |
| Min                                       | 0.00 | 0.01 | 0.01  | 0.02 | 0.000 (0.001)  | 0.000 (0.001) | 0.15 | 0.21            |
| <b>Sum of C<sub>g</sub>+C<sub>p</sub></b> |      |      |       |      |                |               |      |                 |
| <b>(ng/m<sup>3</sup>)</b>                 |      |      |       |      |                |               |      |                 |
| A01                                       | 0.46 | 0.12 | 1.38  | 0.96 | 0.02           | 0.00          | 3.34 | 6.28            |
| A02                                       | 0.26 | 0.26 | 0.84  | 0.40 | 0.06           | 0.00          | 2.57 | 4.39            |
| A03                                       | 1.69 | 0.35 | 11.01 | 7.44 | 0.09           | 0.00          | 1.51 | 22.08           |
| A04                                       | 0.92 | 0.24 | 9.81  | 6.08 | 0.03           | 0.03          | 1.35 | 18.47           |
| A05                                       | 0.47 | 0.34 | 6.54  | 3.87 | 0.03           | 0.00          | 1.28 | 12.52           |
| A06                                       | 0.29 | 0.17 | 3.52  | 3.98 | 0.07           | 0.00          | 1.06 | 9.09            |
| A07                                       | 0.33 | 0.21 | 2.29  | 3.28 | 0.03           | 0.01          | 1.10 | 7.25            |
| A08                                       | 0.16 | 0.10 | 1.25  | 1.59 | 0.05           | 0.00          | 0.77 | 3.93            |

|               |      |      |       |       |      |      |      |       |
|---------------|------|------|-------|-------|------|------|------|-------|
| <b>A09</b>    | 0.37 | 0.20 | 4.02  | 3.45  | 0.02 | 0.02 | 1.02 | 9.12  |
| <b>A10</b>    | 0.21 | 0.11 | 8.12  | 6.66  | 0.04 | 0.00 | 0.98 | 16.10 |
| <b>A11</b>    | 0.30 | 0.31 | 4.81  | 4.73  | 0.01 | 0.00 | 1.03 | 11.20 |
| <b>A12</b>    | 0.29 | 0.16 | 4.33  | 3.23  | 0.08 | 0.01 | 0.59 | 8.69  |
| <b>A13</b>    | 0.71 | 0.18 | 2.67  | 2.29  | 0.08 | 0.00 | 1.29 | 7.22  |
| <b>A14</b>    | 0.67 | 0.22 | 3.68  | 3.24  | 0.03 | 0.01 | 1.29 | 9.14  |
| <b>A15</b>    | 0.38 | 0.19 | 3.66  | 2.76  | 0.03 | 0.01 | 0.78 | 7.80  |
| <b>A16</b>    | 1.24 | 0.26 | 0.18  | 0.32  | 0.04 | 0.00 | 0.77 | 2.84  |
| <b>A17</b>    | 1.54 | 0.45 | 1.65  | 2.19  | 0.02 | 0.00 | 1.68 | 7.54  |
| <b>A18</b>    | 0.15 | 0.19 | 1.40  | 1.09  | 0.07 | 0.00 | 0.87 | 3.78  |
| <b>A19</b>    | 0.15 | 0.08 | 1.31  | 1.15  | 0.04 | 0.00 | 0.49 | 3.21  |
| <b>A20</b>    | 0.27 | 0.15 | 3.83  | 2.61  | 0.01 | 0.00 | 0.54 | 7.41  |
| <b>A21</b>    | 0.51 | 0.39 | 11.76 | 10.50 | 0.05 | 0.02 | 1.10 | 24.33 |
| <b>A22</b>    | 0.26 | 0.23 | 4.67  | 4.32  | 0.07 | 0.01 | 0.89 | 10.46 |
| <b>Mean</b>   | 0.53 | 0.22 | 4.21  | 3.46  | 0.05 | 0.01 | 1.20 | 9.67  |
| <b>S.D.</b>   | 0.44 | 0.10 | 3.31  | 2.48  | 0.02 | 0.01 | 0.66 | 5.86  |
| <b>Median</b> | 0.35 | 0.20 | 3.67  | 3.23  | 0.04 | 0.00 | 1.05 | 8.24  |
| <b>Max</b>    | 1.69 | 0.45 | 11.76 | 10.50 | 0.09 | 0.03 | 3.34 | 24.33 |
| <b>Min</b>    | 0.15 | 0.08 | 0.18  | 0.32  | 0.01 | 0.00 | 0.49 | 2.84  |

Table S 9. Particle-bound fractions ( $\phi$ ) of PAEs in air samples from the South China Sea. The particle-bound fractions are quite uncertain because BBP and DCHP were below MDLs in most particle samples.

| Sample | DMP  | DEP  | DiBP | DnBP | BBP  | DCHP | DEHP | PEs  |
|--------|------|------|------|------|------|------|------|------|
| A01    | 0.01 | 0.17 | 0.01 | 0.02 | 0.01 | 0.02 | 0.16 | 0.10 |
| A02    | 0.02 | 0.05 | 0.11 | 0.16 | 0.01 | 0.49 | 0.45 | 0.30 |
| A03    | 0.05 | 0.59 | 0.73 | 0.71 | 0.01 | 0.42 | 0.69 | 0.67 |
| A04    | 0.03 | 0.29 | 0.65 | 0.59 | 0.06 | 0.30 | 0.36 | 0.57 |
| A05    | 0.03 | 0.24 | 0.78 | 0.71 | 0.01 | 0.19 | 0.47 | 0.68 |
| A06    | 0.07 | 0.23 | 0.84 | 0.86 | 0.04 | 0.29 | 0.37 | 0.75 |
| A07    | 0.03 | 0.18 | 0.16 | 0.50 | 0.13 | 0.72 | 0.36 | 0.34 |
| A08    | 0.06 | 0.40 | 0.77 | 0.78 | 0.03 | 0.65 | 0.40 | 0.65 |
| A09    | 0.06 | 0.35 | 0.71 | 0.76 | 0.09 | 0.52 | 0.38 | 0.66 |
| A10    | 0.08 | 0.42 | 0.98 | 0.99 | 0.15 | 0.72 | 0.75 | 0.95 |
| A11    | 0.05 | 0.16 | 0.63 | 0.75 | 0.18 | 0.79 | 0.52 | 0.64 |
| A12    | 0.03 | 0.10 | 0.07 | 0.10 | 0.02 | 0.17 | 0.40 | 0.10 |
| A13    | 0.04 | 0.18 | 0.13 | 0.21 | 0.02 | 0.54 | 0.34 | 0.19 |
| A14    | 0.03 | 0.32 | 0.03 | 0.07 | 0.13 | 0.54 | 0.39 | 0.10 |
| A15    | 0.05 | 0.72 | 0.87 | 0.86 | 0.28 | 0.76 | 0.60 | 0.80 |
| A16    | 0.13 | 0.54 | 0.70 | 0.52 | 0.06 | 0.36 | 0.72 | 0.41 |
| A17    | 0.01 | 0.14 | 0.09 | 0.11 | 0.12 | 0.37 | 0.36 | 0.14 |
| A18    | 0.2  | 0.68 | 0.22 | 0.29 | 0.02 | 0.42 | 0.78 | 0.39 |
| A19    | 0.05 | 0.24 | 0.01 | 0.02 | 0.01 | 0.21 | 0.30 | 0.07 |
| A20    | 0.1  | 0.46 | 0.96 | 0.95 | 0.13 | 0.86 | 0.59 | 0.89 |
| A21    | 0.08 | 0.52 | 0.89 | 0.90 | 0.09 | 0.91 | 0.73 | 0.86 |
| A22    | 0.05 | 0.13 | 0.01 | 0.01 | 0.01 | 0.06 | 0.38 | 0.05 |
| Mean   | 0.06 | 0.32 | 0.47 | 0.49 | 0.07 | 0.47 | 0.48 | 0.47 |
| S.D.   | 0.04 | 0.19 | 0.37 | 0.35 | 0.07 | 0.26 | 0.17 | 0.30 |

Table S 10. Washout ratio (W) calculated with particle bound fraction following eq.  $W = (1 - \phi)(RT/H) + \phi W_p$ . BBP and DCHP were excluded because of low detection frequency.

| <b>Washout ratio (W)</b> | <b>DMP</b> | <b>DEP</b> | <b>DiBP</b> | <b>DnBP</b> | <b>DEHP</b> |
|--------------------------|------------|------------|-------------|-------------|-------------|
| A01                      | 250001     | 88055      | 18650       | 18661       | 3784        |
| A02                      | 249049     | 97693      | 18794       | 18851       | 9284        |
| A03                      | 241086     | 53620      | 19638       | 19610       | 13992       |
| A04                      | 246568     | 77786      | 19520       | 19444       | 7669        |
| A05                      | 245343     | 81678      | 19696       | 19603       | 9745        |
| A06                      | 237432     | 83066      | 19777       | 19805       | 7783        |
| A07                      | 245799     | 86685      | 18854       | 19323       | 7621        |
| A08                      | 238486     | 69124      | 19680       | 19701       | 8411        |
| A09                      | 239887     | 73298      | 19610       | 19677       | 8006        |
| A10                      | 235434     | 67580      | 19975       | 19983       | 15097       |
| A11                      | 242910     | 88639      | 19502       | 19658       | 10631       |
| A12                      | 246794     | 93344      | 18734       | 18777       | 8327        |
| A13                      | 244920     | 86717      | 18820       | 18923       | 7234        |
| A14                      | 247213     | 75085      | 18674       | 18738       | 8111        |
| A15                      | 241118     | 42584      | 19830       | 19812       | 12229       |
| A16                      | 222975     | 57545      | 19594       | 19352       | 14479       |
| A17                      | 251596     | 90011      | 18759       | 18782       | 7559        |
| A18                      | 207786     | 46031      | 18934       | 19031       | 15690       |
| A19                      | 241474     | 82131      | 18647       | 18670       | 6495        |
| A20                      | 229263     | 64022      | 19945       | 19937       | 12013       |
| A21                      | 235419     | 59487      | 19854       | 19862       | 14700       |
| A22                      | 242384     | 91108      | 18649       | 18656       | 8038        |
| <b>Max</b>               | 251596     | 97693      | 19975       | 19983       | 15690       |
| <b>Min</b>               | 207786     | 42584      | 18647       | 18656       | 3784        |
| <b>Mean</b>              | 240134     | 75241      | 19279       | 19312       | 9859        |
| <b>SD</b>                | 9895       | 15795      | 510         | 480         | 3261        |
| <b>Median</b>            | 241929     | 79732      | 19511       | 19398       | 8369        |

Table S 11. Concentrations of PAEs in the seawater from the South China Sea. The MDLs of PAEs calculated with individual sampling volumes are given in brackets for the calculated concentrations less than MDLs.

| Sample                                                 | DMP  | DEP  | DiBP | DnBP | BBP           | DCHP          | DEHP | PAEs |
|--------------------------------------------------------|------|------|------|------|---------------|---------------|------|------|
| <b>PAE in dissolved phase (<math>C_w</math>, ng/L)</b> |      |      |      |      |               |               |      |      |
| W01                                                    | 0.20 | 0.46 | 0.25 | 1.08 | 0.014         | 0.001 (0.002) | 1.53 | 3.54 |
| W02                                                    | 0.15 | 0.27 | 0.21 | 1.38 | 0.008         | 0.001 (0.001) | 1.39 | 3.40 |
| W03                                                    | 0.41 | 0.30 | 0.14 | 0.73 | 0.006         | 0.001 (0.001) | 0.77 | 2.36 |
| W04                                                    | 0.12 | 0.14 | 0.18 | 0.49 | 0.005         | 0.001 (0.001) | 0.93 | 1.85 |
| W05                                                    | 0.20 | 0.25 | 0.09 | 0.30 | 0.004         | 0.000 (0.001) | 1.32 | 2.16 |
| W06                                                    | 0.24 | 0.14 | 0.11 | 0.50 | 0.003         | 0.001 (0.001) | 0.63 | 1.64 |
| W07                                                    | 0.13 | 0.26 | 0.09 | 0.28 | 0.003         | 0.000 (0.001) | 0.98 | 1.74 |
| W08                                                    | 1.60 | 0.93 | 0.31 | 0.21 | 0.006         | 0.013         | 0.48 | 3.55 |
| W09                                                    | 1.14 | 0.84 | 0.25 | 1.02 | 0.107         | 0.001 (0.005) | 3.52 | 6.88 |
| W10                                                    | 1.30 | 0.57 | 0.13 | 0.17 | 0.027         | 0.007         | 2.03 | 4.23 |
| W11                                                    | 1.16 | 0.77 | 0.20 | 0.43 | 0.012         | 0.001 (0.002) | 2.68 | 5.25 |
| W12                                                    | 0.77 | 0.35 | 0.08 | 0.20 | 0.003         | 0.000 (0.001) | 1.01 | 2.42 |
| W13                                                    | 1.30 | 0.98 | 0.08 | 0.20 | 0.005         | 0.000 (0.002) | 2.87 | 5.43 |
| W14                                                    | 0.25 | 0.43 | 0.09 | 0.22 | 0.008         | 0.000 (0.002) | 3.30 | 4.30 |
| W15                                                    | 0.14 | 0.22 | 0.05 | 0.13 | 0.003         | 0.000 (0.001) | 0.70 | 1.23 |
| W16                                                    | 0.14 | 0.19 | 0.07 | 0.17 | 0.020         | 0.001 (0.001) | 1.04 | 1.62 |
| W17                                                    | 0.17 | 0.14 | 0.08 | 0.24 | 0.003         | 0.000 (0.001) | 0.65 | 1.29 |
| W18                                                    | 0.07 | 0.11 | 1.24 | 0.30 | 0.003         | 0.000 (0.001) | 1.48 | 3.20 |
| W19                                                    | 0.07 | 0.72 | 0.12 | 0.20 | 0.001 (0.001) | 0.000 (0.001) | 0.66 | 1.76 |
| W21                                                    | 0.13 | 0.32 | 0.08 | 0.16 | 0.006         | 0.002         | 0.55 | 1.25 |
| W22                                                    | 0.13 | 0.53 | 0.09 | 0.24 | 0.018         | 0.003         | 0.46 | 1.48 |
| W23                                                    | 0.13 | 0.40 | 0.14 | 0.33 | 0.022         | 0.003         | 0.68 | 1.70 |
| W24                                                    | 0.40 | 0.40 | 0.20 | 0.49 | 0.009         | 0.001 (0.001) | 0.68 | 2.18 |
| W25                                                    | 0.75 | 0.52 | 0.18 | 0.37 | 0.020         | 0.004         | 0.59 | 2.44 |
| W26                                                    | 0.47 | 0.46 | 0.04 | 0.03 | 0.001 (0.001) | 0.000 (0.001) | 0.39 | 1.40 |
| W27                                                    | 0.55 | 0.38 | 0.12 | 0.21 | 0.007         | 0.003         | 0.75 | 2.02 |
| W28                                                    | 0.18 | 0.14 | 0.08 | 0.10 | 0.005         | 0.002         | 0.62 | 1.12 |
| W29                                                    | 0.20 | 0.17 | 0.07 | 0.11 | 0.001 (0.001) | 0.002         | 0.91 | 1.46 |
| W30                                                    | 0.10 | 0.15 | 0.06 | 0.13 | 0.004         | 0.012         | 0.66 | 1.12 |
| W31                                                    | 0.15 | 0.13 | 0.06 | 0.12 | 0.001 (0.001) | 0.001 (0.001) | 0.38 | 0.83 |
| W32                                                    | 0.35 | 0.15 | 0.10 | 0.16 | 0.005         | 0.001 (0.001) | 0.49 | 1.26 |
| W33                                                    | 1.12 | 0.41 | 0.41 | 0.66 | 0.020         | 0.000 (0.001) | 1.84 | 4.46 |
| W34                                                    | 0.37 | 0.19 | 0.19 | 0.27 | 0.002         | 0.000 (0.001) | 0.89 | 1.91 |
| W35                                                    | 0.15 | 0.31 | 0.21 | 0.22 | 0.049         | 0.005         | 1.28 | 2.23 |
| W36                                                    | 0.47 | 0.56 | 0.49 | 0.58 | 0.007         | 0.007         | 2.32 | 4.44 |
| W37                                                    | 2.14 | 0.54 | 0.48 | 0.71 | 0.003         | 0.007         | 1.37 | 5.26 |
| Mean                                                   | 0.48 | 0.38 | 0.19 | 0.37 | 0.012         | 0.002         | 1.19 | 2.62 |
| SD                                                     | 0.51 | 0.24 | 0.21 | 0.30 | 0.019         | 0.003         | 0.83 | 1.52 |

|                                                      |               |              |               |             |               |               |             |             |
|------------------------------------------------------|---------------|--------------|---------------|-------------|---------------|---------------|-------------|-------------|
| <b>Median</b>                                        | 0.22          | 0.34         | 0.12          | 0.24        | 0.005         | 0.001 (0.001) | 0.90        | 2.09        |
| <b>Min</b>                                           | 0.07          | 0.11         | 0.04          | 0.03        | 0.001 (0.001) | 0.000 (0.001) | 0.38        | 0.83        |
| <b>Max</b>                                           | 2.14          | 0.98         | 1.24          | 1.38        | 0.110         | 0.013         | 3.52        | 6.88        |
| <b>PAE in particle phase (C<sub>spm</sub>, ng/L)</b> |               |              |               |             |               |               |             |             |
| <b>W01</b>                                           | 0.046         | 0.11         | 0.05 (0.13)   | 0.18        | 0.010         | 0.000 (0.002) | 1.58        | 1.97 (1.06) |
| <b>W02</b>                                           | 0.030         | 0.09         | 0.07 (0.10)   | 0.20        | 0.011         | 0.000 (0.001) | 0.92        | 1.32        |
| <b>W03</b>                                           | 0.024         | 0.08         | 0.05 (0.08)   | 0.11        | 0.015         | 0.000 (0.001) | 0.99        | 1.27        |
| <b>W04</b>                                           | 0.030         | 0.08         | 0.03 (0.07)   | 0.07        | 0.008         | 0.000 (0.001) | 2.28        | 2.50        |
| <b>W05</b>                                           | 0.012         | 0.05         | 0.03 (0.07)   | 0.07        | 0.005         | 0.000 (0.001) | 0.74        | 0.91        |
| <b>W06</b>                                           | 0.038         | 0.08         | 0.05 (0.07)   | 0.16        | 0.009         | 0.000 (0.001) | 0.64        | 0.98        |
| <b>W07</b>                                           | 0.021         | 0.06         | 0.03 (0.05)   | 0.11        | 0.006         | 0.000 (0.001) | 0.49        | 0.73        |
| <b>W08</b>                                           | 0.019         | 0.05         | 0.02 (0.07)   | 0.23        | 0.026         | 0.002         | 0.57        | 0.92        |
| <b>W09</b>                                           | 0.072         | 0.20 (0.21)  | 0.13 (0.36)   | 0.43        | 0.013         | 0.000 (0.005) | 2.1 (2.2)   | 2.94        |
| <b>W10</b>                                           | 0.018         | 0.04 (0.045) | 0.11          | 0.11        | 0.015         | 0.001 (0.001) | 0.39 (0.47) | 0.69        |
| <b>W11</b>                                           | 0.037         | 0.09 (0.09)  | 0.23          | 0.28        | 0.027         | 0.002 (0.002) | 0.74 (0.95) | 1.41        |
| <b>W12</b>                                           | 0.017         | 0.04 (0.06)  | 0.02 (0.11)   | 0.03        | 0.018         | 0.003         | 0.43 (0.67) | 0.57 (0.89) |
| <b>W13</b>                                           | 0.047         | 0.09 (0.11)  | 0.1 (0.19)    | 0.06        | 0.024         | 0.003         | 0.57(1.17)  | 0.91 (1.55) |
| <b>W14</b>                                           | 0.040         | 0.08         | 0.03 (0.12)   | 0.04        | 0.002 (0.003) | 0.000 (0.002) | 0.44 (0.76) | 0.63 (1.0)  |
| <b>W15</b>                                           | 0.007         | 0.02 (0.02)  | 0.01 (0.04)   | 0.01        | 0.001 (0.001) | 0.000 (0.001) | 0.12 (0.26) | 0.17 (0.34) |
| <b>W16</b>                                           | 0.035         | 0.05         | 0.02 (0.07)   | 0.04        | 0.002 (0.002) | 0.000 (0.001) | 0.28 (0.40) | 0.43 (0.53) |
| <b>W17</b>                                           | 0.038         | 0.06         | 0.01 (0.07)   | 0.08        | 0.001 (0.002) | 0.000 (0.001) | 0.28 (0.40) | 0.47 (0.53) |
| <b>W18</b>                                           | 0.012 (0.015) | 0.03 (0.06)  | 0.03 (0.10)   | 0.06        | 0.001 (0.003) | 0.000 (0.001) | 0.18 (0.63) | 0.31 (0.84) |
| <b>W19</b>                                           | 0.003 (0.008) | 0.01 (0.03)  | 0.02 (0.05)   | 0.01 (0.01) | 0.000 (0.001) | 0.000 (0.001) | 0.12 (0.32) | 0.16 (0.43) |
| <b>W21</b>                                           | 0.007 (0.010) | 0.10         | 0.07 (0.07)   | 0.14        | 0.020         | 0.000 (0.001) | 0.94        | 1.27        |
| <b>W22</b>                                           | 0.008 (0.010) | 0.09         | 0.09          | 0.13        | 0.017         | 0.000 (0.001) | 0.61        | 0.95        |
| <b>W23</b>                                           | 0.011 (0.010) | 0.11         | 0.06 (0.08)   | 0.10        | 0.013         | 0.000 (0.001) | 0.6         | 0.89        |
| <b>W24</b>                                           | 0.011 (0.010) | 0.10         | 0.06 (0.08)   | 0.10        | 0.013         | 0.000 (0.001) | 0.61        | 0.89        |
| <b>W25</b>                                           | 0.009 (0.009) | 0.09         | 0.06 (0.06)   | 0.09        | 0.011         | 0.000 (0.001) | 0.59        | 0.84        |
| <b>W26</b>                                           | 0.004 (0.009) | 0.06         | 0.04 (0.06)   | 0.08        | 0.009         | 0.000 (0.001) | 0.33 (0.38) | 0.52        |
| <b>W27</b>                                           | 0.009 (0.013) | 0.09         | 0.04 (0.09)   | 0.06        | 0.005         | 0.000 (0.001) | 0.39 (0.56) | 0.59 (0.74) |
| <b>W28</b>                                           | 0.012 (0.012) | 0.08         | 0.04 (0.08)   | 0.06        | 0.006         | 0.000 (0.001) | 0.33 (0.50) | 0.53        |
| <b>W29</b>                                           | 0.011 (0.010) | 0.08         | 0.04 (0.07)   | 0.07        | 0.006         | 0.000 (0.001) | 0.37 (0.43) | 0.59        |
| <b>W30</b>                                           | 0.005 (0.007) | 0.05         | 0.03 (0.05)   | 0.04        | 0.004         | 0.000 (0.001) | 0.43        | 0.55        |
| <b>W31</b>                                           | 0.006 (0.008) | 0.03 (0.03)  | 0.02 (0.05)   | 0.03        | 0.002         | 0.000 (0.001) | 0.16 (0.33) | 0.24 (0.44) |
| <b>W32</b>                                           | 0.004 (0.008) | 0.04         | 0.02 (0.06)   | 0.03        | 0.003         | 0.000 (0.001) | 0.19 (0.36) | 0.28 (0.48) |
| <b>W33</b>                                           | 0.005 (0.007) | 0.03 (0.03)  | 0.02 (0.05)   | 0.02        | 0.001 (0.001) | 0.000 (0.001) | 0.53        | 0.60        |
| <b>W34</b>                                           | 0.013 (0.014) | 0.06         | 0.03 (0.10)   | 0.04        | 0.003         | 0.000 (0.001) | 0.26 (0.58) | 0.41 (0.77) |
| <b>W35</b>                                           | 0.009 (0.009) | 0.06         | 0.02 (0.07)   | 0.04        | 0.002 (0.002) | 0.000 (0.001) | 0.2 (0.44)  | 0.33 (0.59) |
| <b>W36</b>                                           | 0.190         | 0.28         | 0.15 (0.37)   | 0.15        | 0.004 (0.01)  | 0.000 (0.005) | 1.01 (2.28) | 1.79 (3.02) |
| <b>W37</b>                                           | 0.034         | 0.05 (0.05)  | 0.05 (0.13)   | 0.05        | 0.005         | 0.000 (0.002) | 0.27 (0.80) | 0.46 (1.06) |
| <b>Mean</b>                                          | 0.025         | 0.076        | 0.052 (0.077) | 0.098       | 0.009         | 0.000 (0.001) | 0.60        | 0.86        |
| <b>SD</b>                                            | 0.032         | 0.049        | 0.045 (0.077) | 0.085       | 0.007         | 0.001 (0.001) | 0.49        | 0.62 (0.62) |
| <b>Median</b>                                        | 0.013         | 0.070        | 0.040 (0.077) | 0.074       | 0.006         | 0.000 (0.001) | 0.47 (0.47) | 0.66        |

|                                                      |               |       |               |               |               |               |             |             |
|------------------------------------------------------|---------------|-------|---------------|---------------|---------------|---------------|-------------|-------------|
| <b>Min</b>                                           | 0.003 (0.011) | 0.013 | 0.009 (0.077) | 0.011 (0.017) | 0.000 (0.002) | 0.000 (0.001) | 0.12 (0.47) | 0.16 (0.62) |
| <b>Max</b>                                           | 0.190         | 0.279 | 0.229         | 0.428         | 0.027         | 0.003         | 2.27        | 2.94        |
| <b>Sum of C<sub>w</sub> + C<sub>SPM</sub> (ng/L)</b> |               |       |               |               |               |               |             |             |
| <b>W01</b>                                           | 0.24          | 0.57  | 0.30          | 1.26          | 0.012         | 0.000 (0.003) | 3.11        | 5.51        |
| <b>W02</b>                                           | 0.18          | 0.36  | 0.27          | 1.58          | 0.009         | 0.000 (0.003) | 2.31        | 4.73        |
| <b>W03</b>                                           | 0.43          | 0.38  | 0.20          | 0.84          | 0.010         | 0.001 (0.002) | 1.76        | 3.63        |
| <b>W04</b>                                           | 0.15          | 0.22  | 0.21          | 0.56          | 0.006         | 0.000 (0.002) | 3.20        | 4.35        |
| <b>W05</b>                                           | 0.21          | 0.30  | 0.12          | 0.37          | 0.005         | 0.000 (0.002) | 2.06        | 3.07        |
| <b>W06</b>                                           | 0.28          | 0.23  | 0.16          | 0.67          | 0.006         | 0.001 (0.002) | 1.28        | 2.62        |
| <b>W07</b>                                           | 0.15          | 0.32  | 0.12          | 0.39          | 0.005         | 0.000 (0.001) | 1.47        | 2.47        |
| <b>W08</b>                                           | 1.62          | 0.98  | 0.33          | 0.44          | 0.016         | 0.008         | 1.05        | 4.47        |
| <b>W09</b>                                           | 1.21          | 1.04  | 0.38          | 1.44          | 0.060         | 0.000 (0.009) | 5.62        | 9.82        |
| <b>W10</b>                                           | 1.32          | 0.61  | 0.24          | 0.28          | 0.021         | 0.004         | 2.42        | 4.92        |
| <b>W11</b>                                           | 1.20          | 0.85  | 0.43          | 0.71          | 0.020         | 0.002 (0.004) | 3.42        | 6.65        |
| <b>W12</b>                                           | 0.79          | 0.40  | 0.09          | 0.23          | 0.011         | 0.002 (0.003) | 1.45        | 2.99        |
| <b>W13</b>                                           | 1.34          | 1.08  | 0.18          | 0.26          | 0.014         | 0.002 (0.005) | 3.44        | 6.34        |
| <b>W14</b>                                           | 0.29          | 0.51  | 0.12          | 0.26          | 0.005 (0.005) | 0.000 (0.003) | 3.74        | 4.93        |
| <b>W15</b>                                           | 0.14          | 0.23  | 0.06          | 0.14          | 0.002 (0.002) | 0.000 (0.001) | 0.82        | 1.40        |
| <b>W16</b>                                           | 0.17          | 0.24  | 0.09          | 0.21          | 0.011         | 0.000 (0.002) | 1.32        | 2.06        |
| <b>W17</b>                                           | 0.21          | 0.20  | 0.10          | 0.32          | 0.002 (0.003) | 0.000 (0.002) | 0.93        | 1.76        |
| <b>W18</b>                                           | 0.08          | 0.14  | 1.27          | 0.36          | 0.002 (0.004) | 0.000 (0.003) | 1.66        | 3.51        |
| <b>W19</b>                                           | 0.07          | 0.74  | 0.13          | 0.21          | 0.001 (0.002) | 0.000 (0.001) | 0.78        | 1.93        |
| <b>W21</b>                                           | 0.14          | 0.42  | 0.15          | 0.30          | 0.013         | 0.001 (0.002) | 1.49        | 2.52        |
| <b>W22</b>                                           | 0.14          | 0.62  | 0.18          | 0.38          | 0.017         | 0.002 (0.002) | 1.07        | 2.43        |
| <b>W23</b>                                           | 0.14          | 0.51  | 0.20          | 0.43          | 0.017         | 0.001 (0.002) | 1.27        | 2.59        |
| <b>W24</b>                                           | 0.41          | 0.50  | 0.26          | 0.59          | 0.011         | 0.001 (0.002) | 1.29        | 3.07        |
| <b>W25</b>                                           | 0.76          | 0.61  | 0.24          | 0.46          | 0.016         | 0.002 (0.002) | 1.18        | 3.28        |
| <b>W26</b>                                           | 0.47          | 0.52  | 0.09          | 0.11          | 0.005         | 0.000 (0.002) | 0.72        | 1.92        |
| <b>W27</b>                                           | 0.56          | 0.47  | 0.16          | 0.26          | 0.006         | 0.002 (0.002) | 1.14        | 2.61        |
| <b>W28</b>                                           | 0.20          | 0.21  | 0.12          | 0.15          | 0.005         | 0.001 (0.002) | 0.95        | 1.65        |
| <b>W29</b>                                           | 0.21          | 0.25  | 0.11          | 0.19          | 0.004         | 0.001 (0.002) | 1.28        | 2.05        |
| <b>W30</b>                                           | 0.10          | 0.20  | 0.09          | 0.18          | 0.004         | 0.006         | 1.08        | 1.67        |
| <b>W31</b>                                           | 0.16          | 0.16  | 0.08          | 0.15          | 0.001 (0.002) | 0.000 (0.001) | 0.53        | 1.08        |
| <b>W32</b>                                           | 0.36          | 0.19  | 0.12          | 0.19          | 0.004         | 0.001 (0.002) | 0.68        | 1.54        |
| <b>W33</b>                                           | 1.13          | 0.44  | 0.43          | 0.68          | 0.011         | 0.000 (0.001) | 2.36        | 5.06        |
| <b>W34</b>                                           | 0.38          | 0.25  | 0.22          | 0.31          | 0.003 (0.004) | 0.000 (0.002) | 1.15        | 2.32        |
| <b>W35</b>                                           | 0.16          | 0.37  | 0.23          | 0.26          | 0.025         | 0.002 (0.002) | 1.48        | 2.56        |
| <b>W36</b>                                           | 0.66          | 0.84  | 0.64          | 0.74          | 0.005 (0.015) | 0.004 (0.010) | 3.33        | 6.23        |
| <b>W37</b>                                           | 2.17          | 0.59  | 0.53          | 0.76          | 0.004 (0.005) | 0.004         | 1.64        | 5.72        |
| <b>Mean</b>                                          | 0.51          | 0.46  | 0.24          | 0.46          | 0.02          | 0.003 (0.002) | 1.79        | 3.48        |
| <b>SD</b>                                            | 0.51          | 0.26  | 0.22          | 0.36          | 0.02          | 0.003 (0.002) | 1.11        | 1.89        |
| <b>Median</b>                                        | 0.26          | 0.41  | 0.18          | 0.34          | 0.01          | 0.000 (0.002) | 1.38        | 2.81        |
| <b>Min</b>                                           | 0.07          | 0.14  | 0.06          | 0.11          | 0.002 (0.003) | 0.000 (0.002) | 0.53        | 1.08        |

|            |      |      |      |      |      |      |      |      |
|------------|------|------|------|------|------|------|------|------|
| <b>Max</b> | 2.17 | 1.08 | 1.27 | 1.58 | 0.12 | 0.02 | 5.62 | 9.82 |
|------------|------|------|------|------|------|------|------|------|



Table S 12. Comparison with previous studies for the concentrations of seven PAEs in seawater (ng/L)

| Region                                         | DMP       | DEP        | DiBP        | DnBP       | BBP        | DCHP       | DEHP        |
|------------------------------------------------|-----------|------------|-------------|------------|------------|------------|-------------|
| Arctic <sup>11</sup>                           | n.d.- 0.3 | n.d.-0.8   | n.d.-0.2    | 0.008-0.3  | n.d.-0.05  | -          | n.d.-3.3    |
| North Sea (Germany) <sup>5</sup>               | 0.23      | 1.45       | -           | 1.74       | 0.07       | -          | 3.8         |
| North Sea (Belgium) <sup>12</sup>              | -         | < 25-753   | -           | < 5-2645   | < 10-343   | -          | 66-766      |
| East China Sea, China <sup>13-15</sup>         | 0.08-830  | 0.25-2404  | 5-17256     | 11-17952   | 0.09-344   | 0.05-705   | 9- 9738     |
| Bohai and Yellow Seas, China <sup>16, 17</sup> | n.d.-160  | 1.18-85.9  | 89.3-2424   | n.d.-2226  | n.d.-7.8   | 1.34-3.12  | 51.4-3388   |
| Pearl River Delta, China <sup>18</sup>         | 1.7-13.6  | < 5.1-34.8 | < 30.2-70.3 | < 33.2-358 | n.d.       | n.d.       | 12.7-1050   |
| Mediterranean Sea <sup>19-21</sup>             | 1.4-140   | 6.9-870    | 56.5-383.4  | 63.4-466   | 1-100      | -          | 30-5970     |
| Bay of Biscay, Spain <sup>22</sup>             | 7.5±0.4   | 33±3       | -           | 83±7       | 8±1        | 64±4       | -           |
| Barkley Sound, Canada <sup>23</sup>            | -         | -          | -           | 18-3000    | -          | -          | 10-950      |
| Puget Sound, USA <sup>23</sup>                 | -         | -          | -           | -          | -          | -          | 60-640      |
| Klang River estuary, Australia <sup>24</sup>   | -         | -          | -           | -          | -          | -          | 3100-64300  |
| South Korea <sup>25</sup>                      | 20-100    | 20-150     | -           | 40-360     | -          | -          | 30-300      |
| Tropical western Pacific Ocean <sup>26</sup>   | n.d.-7    | n.d.-2.1   | 1.9-14      | 2.2-13     | n.d.-5.5   | 1.1-7      | 2.0-9.2     |
| Caspian Sea, Iran <sup>27</sup>                | 490       | 520        | -           | -          | -          | -          | -           |
| Thailand <sup>28</sup>                         | -         | -          | -           | 230-770    | -          | -          | 310-1160    |
| Tunisia <sup>29</sup>                          | -         | < 10-17000 | < 5-106000  | < 29-30500 | -          | -          | < 26-168000 |
| <b>This work</b>                               | 0.07-2.17 | 0.14-1.08  | 0.06-1.27   | 0.11-1.58  | <n.d.-0.12 | <n.d.-0.02 | 0.53-5.62   |

Table S 13. Particle-bound fractions ( $\phi$ ) of PAEs in seawater from the South China Sea

| <b>Sample</b> | <b>DMP</b> | <b>DEP</b> | <b>DiBP</b> | <b>DnBP</b> | <b>DEHP</b> | <b>PAE</b> |
|---------------|------------|------------|-------------|-------------|-------------|------------|
| <b>W01</b>    | 0.19       | 0.20       | 0.16        | 0.14        | 0.51        | 1.80       |
| <b>W02</b>    | 0.16       | 0.26       | 0.24        | 0.13        | 0.40        | 1.90       |
| <b>W03</b>    | 0.06       | 0.21       | 0.27        | 0.13        | 0.56        | 2.11       |
| <b>W04</b>    | 0.20       | 0.35       | 0.15        | 0.13        | 0.71        | 2.30       |
| <b>W05</b>    | 0.06       | 0.18       | 0.23        | 0.20        | 0.36        | 1.71       |
| <b>W06</b>    | 0.14       | 0.36       | 0.31        | 0.24        | 0.50        | 2.48       |
| <b>W07</b>    | 0.13       | 0.19       | 0.29        | 0.29        | 0.33        | 2.03       |
| <b>W08</b>    | 0.01       | 0.05       | 0.07        | 0.52        | 0.55        | 2.14       |
| <b>W09</b>    | 0.06       | 0.19       | 0.33        | 0.30        | 0.37        | 1.67       |
| <b>W10</b>    | 0.01       | 0.07       | 0.46        | 0.39        | 0.16        | 1.54       |
| <b>W11</b>    | 0.03       | 0.10       | 0.54        | 0.40        | 0.22        | 2.71       |
| <b>W12</b>    | 0.02       | 0.11       | 0.18        | 0.15        | 0.30        | 2.48       |
| <b>W13</b>    | 0.04       | 0.09       | 0.57        | 0.23        | 0.17        | 2.82       |
| <b>W14</b>    | 0.14       | 0.15       | 0.21        | 0.16        | 0.12        | 1.26       |
| <b>W15</b>    | 0.05       | 0.08       | 0.15        | 0.08        | 0.15        | 0.80       |
| <b>W16</b>    | 0.20       | 0.22       | 0.21        | 0.21        | 0.21        | 1.19       |
| <b>W17</b>    | 0.18       | 0.32       | 0.15        | 0.24        | 0.30        | 1.62       |
| <b>W18</b>    | 0.15       | 0.24       | 0.02        | 0.16        | 0.11        | 0.94       |
| <b>W19</b>    | 0.04       | 0.02       | 0.11        | 0.06        | 0.16        | 0.96       |
| <b>W21</b>    | 0.05       | 0.23       | 0.47        | 0.45        | 0.63        | 2.65       |
| <b>W22</b>    | 0.06       | 0.15       | 0.48        | 0.36        | 0.57        | 2.14       |
| <b>W23</b>    | 0.07       | 0.21       | 0.29        | 0.24        | 0.47        | 1.69       |
| <b>W24</b>    | 0.02       | 0.20       | 0.22        | 0.18        | 0.47        | 1.72       |
| <b>W25</b>    | 0.01       | 0.14       | 0.24        | 0.19        | 0.50        | 1.51       |
| <b>W26</b>    | 0.01       | 0.12       | 0.49        | 0.70        | 0.45        | 3.07       |
| <b>W27</b>    | 0.02       | 0.19       | 0.26        | 0.22        | 0.34        | 1.50       |
| <b>W28</b>    | 0.06       | 0.36       | 0.32        | 0.38        | 0.35        | 2.08       |
| <b>W29</b>    | 0.05       | 0.33       | 0.38        | 0.39        | 0.29        | 2.30       |
| <b>W30</b>    | 0.05       | 0.23       | 0.28        | 0.25        | 0.40        | 1.74       |
| <b>W31</b>    | 0.04       | 0.20       | 0.23        | 0.18        | 0.29        | 1.80       |
| <b>W32</b>    | 0.01       | 0.20       | 0.17        | 0.15        | 0.28        | 1.21       |
| <b>W33</b>    | 0.00       | 0.06       | 0.04        | 0.03        | 0.22        | 0.56       |
| <b>W34</b>    | 0.04       | 0.23       | 0.14        | 0.14        | 0.22        | 1.37       |
| <b>W35</b>    | 0.05       | 0.15       | 0.09        | 0.14        | 0.14        | 0.62       |
| <b>W36</b>    | 0.29       | 0.33       | 0.23        | 0.21        | 0.30        | 1.74       |
| <b>W37</b>    | 0.02       | 0.09       | 0.10        | 0.06        | 0.17        | 1.11       |
| <b>Mean</b>   | 0.08       | 0.19       | 0.25        | 0.23        | 0.34        | 1.76       |
| <b>SD</b>     | 0.07       | 0.09       | 0.14        | 0.14        | 0.16        | 0.62       |

Table S 14. Correlation analysis of PAEs in air

|             | <b>DMP</b>      | <b>DEP</b>      | <b>DiBP</b>     | <b>DnBP</b>     | <b>DEHP</b>   |
|-------------|-----------------|-----------------|-----------------|-----------------|---------------|
| <b>DMP</b>  | 1(0.000***)     | 0.647(0.001***) | 0.242(0.279)    | 0.168(0.455)    | 0.214(0.339)  |
| <b>DEP</b>  | 0.647(0.001***) | 1(0.000***)     | 0.385(0.077*)   | 0.398(0.067*)   | 0.199(0.375)  |
| <b>DiBP</b> | 0.242(0.279)    | 0.385(0.077*)   | 1(0.000***)     | 0.951(0.000***) | -0.091(0.686) |
| <b>DnBP</b> | 0.168(0.455)    | 0.398(0.067*)   | 0.951(0.000***) | 1(0.000***)     | -0.148(0.512) |
| <b>DEHP</b> | 0.214(0.339)    | 0.199(0.375)    | -0.091(0.686)   | -0.148(0.512)   | 1(0.000***)   |

\*\*\*, \*\*, \*means significant 0.01, 0.05, 0.1

Table S 15. Correlation analysis of PAEs in seawater

|             | <b>DMP</b>      | <b>DEP</b>      | <b>DiBP</b>   | <b>DnBP</b>     | <b>DEHP</b>     |
|-------------|-----------------|-----------------|---------------|-----------------|-----------------|
| <b>DMP</b>  | 1(0.000***)     | 0.659(0.000***) | 0.27(0.112)   | 0.245(0.150)    | 0.354(0.034**)  |
| <b>DEP</b>  | 0.659(0.000***) | 1(0.000***)     | 0.174(0.311)  | 0.336(0.045**)  | 0.55(0.001***)  |
| <b>DiBP</b> | 0.27(0.112)     | 0.174(0.311)    | 1(0.000***)   | 0.324(0.054*)   | 0.296(0.080*)   |
| <b>DnBP</b> | 0.245(0.150)    | 0.336(0.045**)  | 0.324(0.054*) | 1(0.000***)     | 0.611(0.000***) |
| <b>DEHP</b> | 0.354(0.034**)  | 0.55(0.001***)  | 0.296(0.080*) | 0.611(0.000***) | 1(0.000***)     |

\*\*\*, \*\*, \*means significant 0.01, 0.05, 0.1

Table S 16. Air-sea exchange fluxes of PAEs (DMP, DEP, DiBP, DnBP and DEHP) in the South China Sea. Positive value indicates water to air volatilization and negative value indicates air to water deposition

| <b>F (ng/m<sup>2</sup>/day)</b> | <b>DMP</b> | <b>DEP</b> | <b>DiBP</b> | <b>DnBP</b> | <b>DEHP</b> |
|---------------------------------|------------|------------|-------------|-------------|-------------|
| <b>W01</b>                      | -970       | -85        | -1488       | -1015       | 918         |
| <b>W02</b>                      | -888       | -71        | -657        | -435        | 57          |
| <b>W03</b>                      | -969       | -88        | -1502       | -1048       | 419         |
| <b>W04</b>                      | -391       | -79        | -1278       | -899        | 331         |
| <b>W05</b>                      | -392       | -78        | -1337       | -947        | 919         |
| <b>W06</b>                      | -243       | -147       | -671        | -489        | 314         |
| <b>W07</b>                      | -243       | -146       | -674        | -505        | 528         |
| <b>W08</b>                      | -241       | -109       | -440        | -444        | 470         |
| <b>W09</b>                      | -245       | -110       | -434        | -335        | 3538        |
| <b>W10</b>                      | -244       | -118       | -457        | -445        | 2255        |
| <b>W11</b>                      | -174       | -79        | -303        | -279        | 1419        |
| <b>W12</b>                      | -176       | -86        | -313        | -297        | 492         |
| <b>W13</b>                      | -210       | -102       | -1054       | -874        | 1272        |
| <b>W14</b>                      | -217       | -112       | -1138       | -943        | 3616        |
| <b>W15</b>                      | -104       | -41        | -172        | -198        | 733         |
| <b>W16</b>                      | -106       | -42        | -172        | -197        | 1059        |
| <b>W17</b>                      | -244       | -94        | -678        | -465        | 444         |
| <b>W18</b>                      | -258       | -100       | -628        | -494        | 1593        |
| <b>W19</b>                      | -258       | -90        | -726        | -505        | 601         |
| <b>W21</b>                      | -164       | -53        | -107        | -48         | 740         |
| <b>W22</b>                      | -181       | -161       | -959        | -634        | 338         |
| <b>W23</b>                      | -181       | -163       | -961        | -631        | 600         |
| <b>W24</b>                      | -177       | -88        | -2080       | -1470       | 310         |
| <b>W25</b>                      | -174       | -86        | -2042       | -1451       | 214         |
| <b>W26</b>                      | -177       | -87        | -2178       | -1568       | 233         |
| <b>W27</b>                      | -460       | -104       | -1349       | -1050       | 435         |
| <b>W28</b>                      | -419       | -92        | -1120       | -927        | 33          |
| <b>W29</b>                      | -442       | -104       | -1896       | -1579       | 255         |
| <b>W30</b>                      | -443       | -105       | -1948       | -1622       | 194         |
| <b>W31</b>                      | -279       | -42        | -284        | -230        | 159         |
| <b>W32</b>                      | -371       | -42        | -12         | -40         | 273         |
| <b>W33</b>                      | -1487      | -383       | -1162       | -1500       | 1308        |
| <b>W34</b>                      | -1497      | -391       | -1226       | -1596       | 663         |
| <b>W35</b>                      | -44        | -21        | -328        | -229        | 329         |
| <b>W36</b>                      | -44        | -19        | -342        | -231        | 1366        |
| <b>W37</b>                      | -190       | -77        | -406        | -326        | 361         |
| <b>mean</b>                     | -370       | -105       | -903        | -721        | 800         |

Table S 17. Particle dry deposition of PAEs in the South China Sea

| <b>F<sub>D</sub> (ng/m<sup>2</sup>/day)</b> | <b>DMP</b> | <b>DEP</b> | <b>DiBP</b> | <b>DnBP</b> | <b>DEHP</b> |
|---------------------------------------------|------------|------------|-------------|-------------|-------------|
| <b>A01</b>                                  | 1.2        | 3.6        | 2.2         | 2.8         | 94          |
| <b>A02</b>                                  | 0.9        | 2.2        | 16.5        | 10.9        | 198         |
| <b>A03</b>                                  | 15.4       | 35.7       | 1396        | 918         | 179         |
| <b>A04</b>                                  | 4.7        | 12.4       | 1097        | 623         | 85          |
| <b>A05</b>                                  | 2.8        | 14.6       | 877         | 473         | 104         |
| <b>A06</b>                                  | 3.4        | 6.7        | 508         | 590         | 67          |
| <b>A07</b>                                  | 1.9        | 6.5        | 63          | 284         | 68          |
| <b>A08</b>                                  | 1.8        | 7.0        | 165         | 214         | 54          |
| <b>A09</b>                                  | 3.8        | 12.2       | 496         | 454         | 67          |
| <b>A10</b>                                  | 2.7        | 8.0        | 1378        | 1135        | 126         |
| <b>A11</b>                                  | 2.4        | 8.3        | 528         | 612         | 92          |
| <b>A12</b>                                  | 1.4        | 2.8        | 53          | 57          | 40          |
| <b>A13</b>                                  | 4.4        | 5.9        | 62          | 83          | 76          |
| <b>A14</b>                                  | 3.1        | 12.5       | 17          | 41          | 86          |
| <b>A15</b>                                  | 3.5        | 24.4       | 553         | 411         | 80          |
| <b>A16</b>                                  | 28.1       | 24.4       | 22          | 29          | 96          |
| <b>A17</b>                                  | 2.1        | 11.0       | 25          | 40          | 103         |
| <b>A18</b>                                  | 5.0        | 22.4       | 53          | 54          | 118         |
| <b>A19</b>                                  | 1.3        | 3.1        | 1.6         | 4.6         | 26          |
| <b>A20</b>                                  | 4.7        | 11.4       | 634         | 430         | 55          |
| <b>A21</b>                                  | 6.8        | 34.7       | 1814        | 1631        | 138         |
| <b>A22</b>                                  | 2.2        | 5.2        | 6.4         | 10          | 58          |
| <b>Max</b>                                  | 28         | 35.7       | 1814        | 1631        | 198         |
| <b>Min</b>                                  | 0.86       | 2.21       | 1.6         | 2.8         | 26          |
| <b>Mean</b>                                 | 4.71       | 12.5       | 444         | 368         | 91          |
| <b>SD</b>                                   | 6.04       | 9.81       | 548         | 427         | 42          |
| <b>Median</b>                               | 2.93       | 9.68       | 114         | 249         | 86          |

## References

1. Bidleman, T. F., Atmospheric processes - wet and dry deposition of organic-compounds are controlled by vapor particle partitioning. *Environmental Science & Technology* **1988**, *22* (4), 361-367.
2. Ligocki, M. P.; Leuenberger, C.; Pankow, J. F., Trace organic compounds in rains-III. Particle scavenging of neutral organic compounds. *Atmospheric Environment* **1967**, *19*, 1619-1626.
3. Bamford, H. A.; Offenberg, J. H.; Larsen, R. K.; Ko, F. C.; Baker, J. E., Diffusive exchange of polycyclic aromatic hydrocarbons across the air-water interface of the Patapsco River, an urbanized subestuary of the Chesapeake Bay. *Environmental Science & Technology* **1999**, *33* (13), 2138-2144.
4. Bamford, H. A.; Ko, F. C.; Baker, J. E., Seasonal and annual air-water exchange of polychlorinated biphenyls across Baltimore Harbor and the northern Chesapeake Bay. *Environmental Science & Technology* **2002**, *36* (20), 4245-4252.
5. Xie, Z. Y.; Ebinghaus, R.; Temme, C.; Caba, A.; Ruck, W., Atmospheric concentrations and air-sea exchanges of phthalates in the North Sea (German Bight). *Atmospheric Environment* **2005**, *39* (18), 3209-3219.
6. Schwarzenbach, R. O.; Gschwend, P. M.; Imboden, D. M., *Environmental Organic Chemistry, 3rd Edition*. 2016.
7. Wanninkhof, R., Relationship between wind-speed and gas-exchange over the ocean. *Journal of Geophysical Research-Oceans* **1992**, *97* (C5), 7373-7382.
8. Gao, Y.; Wang, L. F.; Guo, X. H.; Xu, Y.; Luo, L., Atmospheric wet and dry deposition of dissolved inorganic nitrogen to the South China Sea. *Science China-Earth Sciences* **2020**, *63* (9), 1339-1352.
9. Cousins, I.; Mackay, D., Correlating the physical-chemical properties of phthalate esters using the 'three solubility' approach. *Chemosphere* **2000**, *41* (9), 1389-1399.
10. Perterson, D. R., Staples, C.A., *Degradation of Phthalate Esters in the Environment. The Handbook of Environmental Chemistry*. Springer-Verlag: Berlin/Heidelberg: Berlin, 2003; Vol. 3.
11. Xie, Z. Y.; Ebinghaus, R.; Temme, C.; Lohmann, R.; Caba, A.; Ruck, W., Occurrence and air-sea exchange of phthalates in the arctic. *Environmental Science & Technology* **2007**, *41* (13), 4555-4560.
12. Huysman, S.; Van Meulebroek, L.; Janssens, O.; Vanryckeghem, F.; Van Langenhove, H.; Demeestere, K.; Vanhaecke, L., Targeted quantification and untargeted screening of alkylphenols, bisphenol A and phthalates in aquatic matrices using ultra-high-performance liquid chromatography coupled to hybrid Q-Orbitrap mass spectrometry. *Anal Chim Acta* **2019**, *1049*, 141-151.
13. Zhang, Z. M.; Zhang, J.; Zhang, H. H.; Shi, X. Z.; Zou, Y. W.; Yang, G. P., Pollution characteristics, spatial variation, and potential risks of phthalate esters in the water-sediment system of the Yangtze River estuary and its adjacent East China Sea. *Environ Pollut* **2020**, *265* (Pt A).
14. Wang, L. Y.; Gu, Y. Y.; Zhang, Z. M.; Sun, A. L.; Shi, X. Z.; Chen, J.; Lu, Y., Contaminant occurrence, mobility and ecological risk assessment of phthalate esters in the sediment-water system of the Hangzhou Bay. *Science of the Total Environment* **2021**, *770*, 114913.
15. Zhang, Z. M.; Zhang, H. H.; Zhang, J.; Wang, Q. W.; Yang, G. P., Occurrence, distribution, and ecological risks of phthalate esters in the seawater and sediment of Changjiang River Estuary and its adjacent area. *Sci Total Environ* **2018**, *619*, 93-102.
16. Liu, Y. D.; Li, Z. Z.; Jalon-Rojas, I.; Wang, X. H.; Fredj, E.; Zhang, D. H.; Feng, L. J.; Li, X. G., Assessing the potential risk and relationship between microplastics and phthalates in surface seawater of a heavily human-impacted metropolitan bay in northern China. *Ecotoxicology and Environmental Safety* **2020**, *204*, 111067.
17. Zhang, Z. M.; Zhang, H. H.; Zou, Y. W.; Yang, G. P., Distribution and ecotoxicological state of phthalate esters in the sea-surface microlayer, seawater and sediment of the Bohai Sea and the Yellow Sea. *Environ Pollut* **2018**, *240*, 235-247.

18. Cao, Y. R.; Li, J.; Wu, R. B.; Lin, H. J.; Lao, J. Y.; Ruan, Y. F.; Zhang, K.; Wu, J. X.; Leung, K. M. Y.; Lam, P. K. S., Phthalate esters in seawater and sediment of the northern South China Sea: Occurrence, distribution, and ecological risks. *Science of the Total Environment* **2022**, *811*, 151412.
19. Castro-Jimenez, J.; Ratola, N., An innovative approach for the simultaneous quantitative screening of organic plastic additives in complex matrices in marine coastal areas. *Environ Sci Pollut R* **2020**, *27* (10), 11450-11457.
20. Paluselli, A.; Aminot, Y.; Galgani, F.; Net, S.; Sempere, R., Occurrence of phthalate acid esters (PAEs) in the northwestern Mediterranean Sea and the Rhone River. *Progress in Oceanography* **2018**, *163*, 221-231.
21. Sanchez-Avila, J.; Tauler, R.; Lacorte, S., Organic micropollutants in coastal waters from NW Mediterranean Sea: Sources distribution and potential risk. *Environ Int* **2012**, *46*, 50-62.
22. Prieto, A.; Zuloaga, O.; Usobiaga, A.; Etxebarria, N.; Fernandez, L. A., Development of a stir bar sorptive extraction and thermal desorption-gas chromatography-mass spectrometry method for the simultaneous determination of several persistent organic pollutants in water samples. *J Chromatogr A* **2007**, *1174* (1-2), 40-49.
23. Keil, R.; Saleme, K.; Forrest, B.; Neibauer, J.; Logsdon, M., Differential presence of anthropogenic compounds dissolved in the marine waters of Puget Sound, WA and Barkley Sound, BC. *Mar Pollut Bull* **2011**, *62* (11), 2404-2411.
24. Tan, G. H., Residue Levels of Phthalate-Esters in Water and Sediment Samples from the Klang River Basin. *B Environ Contam Tox* **1995**, *54* (2), 171-176.
25. Heo, H.; Choi, M. J.; Park, J.; Nam, T.; Cho, J., Anthropogenic Occurrence of Phthalate Esters in Beach Seawater in the Southeast Coast Region, South Korea. *Water* **2020**, *12*, 122.
26. Zhang, Q.; Song, J. M.; Li, X. G.; Peng, Q. C.; Yuan, H. M.; Li, N.; Duan, L. Q.; Ma, J., Concentrations and distribution of phthalate esters in the seamount area of the Tropical Western Pacific Ocean. *Marine Pollution Bulletin* **2019**, *140*, 107-115.
27. Hadjmohammadi, M. R.; Fatemi, M. H.; Taneh, T., Coacervative Extraction of Phthalates from Water and Their Determination by High Performance Liquid Chromatography. *J Iran Chem Soc* **2011**, *8* (1), 100-106.
28. Malem, F.; Soonthondecha, P.; Khawmodjod, P.; Chunchakorn, V.; Whitlow, H. J.; Chienthavorn, O., Occurrence of phthalate esters in the eastern coast of Thailand. *Environmental Monitoring and Assessment* **2019**, *191*, 627.
29. Jebara, A.; Albergamo, A.; Rando, R.; Potorti, A. G.; Lo Turco, V.; Ben Mansour, H.; Di Bella, G., Phthalates and non-phthalate plasticizers in Tunisian marine samples: Occurrence, spatial distribution and seasonal variation. *Marine Pollution Bulletin* **2021**, *163*, 111967.
